# Supplementary material for: Unravelling the structural complexity of glycolipids with cryogenic infrared spectroscopy
Source: PubMed Central journal article supplement (PMC7900115; doi:10.1038/s41467-021-21480-1), 2021-02-22
Supplement: 41467_2021_21480_MOESM1_ESM.pdf [file 41467_2021_21480_MOESM1_ESM.pdf]

# Unravelling the Structural Complexity of Glycolipids with Cryogenic Infrared Spectroscopy

## Supplementary Information

Carla Kirschbaum<sup>1,2</sup>, Kim Greis<sup>1,2</sup>, Eike Mucha<sup>2</sup>, Lisa Kain<sup>3</sup>, Shenglou Deng<sup>4</sup>, Andreas Zappe<sup>1</sup>, Sandy Gewinner<sup>2</sup>, Wieland Schöllkopf<sup>2</sup>, Gert von Helden<sup>2</sup>, Gerard Meijer<sup>2</sup>, Paul B. Savage<sup>4</sup>, Mateusz Marianski<sup>5,6</sup>, Luc Teyton<sup>3</sup>, Kevin Pagel<sup>1,2\*</sup>

1 Institut für Chemie und Biochemie, Freie Universität Berlin, 14195 Berlin, Germany

2 Fritz-Haber-Institut der Max-Planck-Gesellschaft, 14195 Berlin, Germany

3 Department of Immunology and Microbiology, Scripps Research, La Jolla, CA 92037, USA

4 Department of Chemistry and Biochemistry, Brigham Young University, Provo, UT 84602, USA

5 Department of Chemistry and Biochemistry, Hunter College, The City University of New York, New York, NY 10065, USA

6 The PhD Program in Chemistry, Graduate Center, The City University of New York, New York, NY 10016, USA

Correspondence to: [kevin.pagel@fu-berlin.de](mailto:kevin.pagel@fu-berlin.de)

# Table of Contents

|                                                                           |    |
|---------------------------------------------------------------------------|----|
| Abbreviations .....                                                       | 2  |
| List of Investigated Glycolipids .....                                    | 3  |
| Ion Mobility-Mass Spectrometry and Tandem Mass Spectrometry.....          | 5  |
| Supplementary IR Spectra.....                                             | 7  |
| Synthetic Mixtures of $\alpha$ -and $\beta$ -GalCer.....                  | 10 |
| Synthetic Mixtures of Monoglycosyl Phytosphingosines (4 Components) ..... | 13 |
| Biological Application: Glycosylceramides .....                           | 17 |
| Computed IR Spectra and Structures.....                                   | 25 |

## Abbreviations

Cer = Ceramide; Gal = Galactose; Glc = Glucose; GlcA = Glucuronic Acid; Gb3 = Globotriose; iGb3 = iso-Globotriose; DAG = Diacylglycerol

# List of Investigated Glycolipids

**Supplementary Table 1** Names, structures and exact masses of the investigated glycolipids.

## Glycosylceramides; exact mass: 809.7 u

$\alpha$ -GlcCer (d18:1/24:1(15Z))

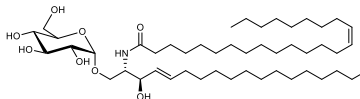

$\beta$ -GlcCer (d18:1/24:1(15Z))

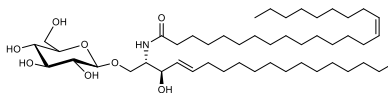

$\alpha$ -GalCer (d18:1/24:1(15Z))

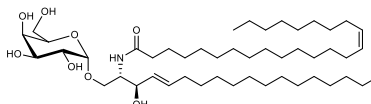

$\beta$ -GalCer (d18:1/24:1(15Z))

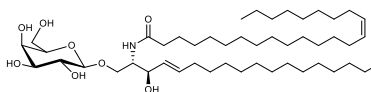

## Glycosylsphingosines; exact mass: 461.3 u

$\alpha$ -Glc sphingosine

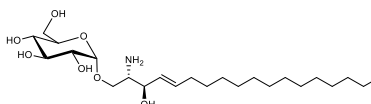

$\beta$ -Glc sphingosine

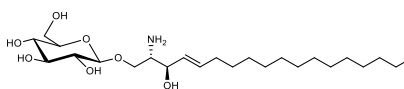

$\alpha$ -Gal sphingosine

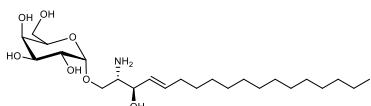

$\beta$ -Gal sphingosine

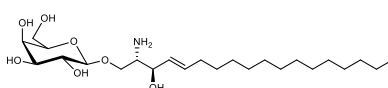

## Glycosylphytosphingosines; exact mass: 479.4 u

$\alpha$ -Glc phytosphingosine

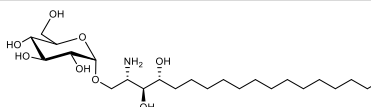

$\beta$ -Glc phytosphingosine

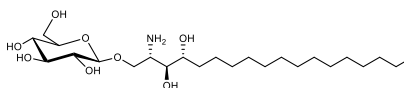

$\alpha$ -Gal phytosphingosine

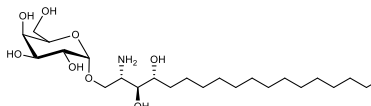

$\beta$ -Gal phytosphingosine

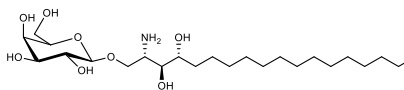

**Glycosylphosphingosines; exact mass: 493.3 u**

$\alpha$ -GlcA phytosphingosine

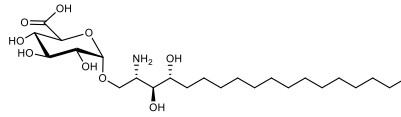

$\beta$ -GlcA phytosphingosine

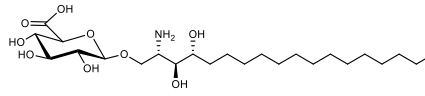

**(iso-)Globotriaosylsphingosines; exact mass: 785.4 u**

$\beta$ -Gb3 sphingosine

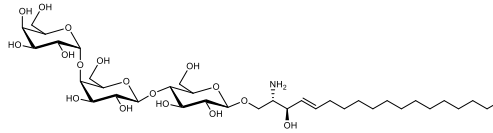

$\beta$ -iGb3 sphingosine

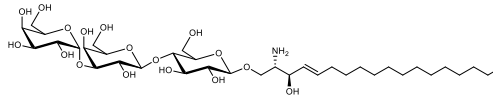

**Globotriaosylceramide; exact mass: 1163.8 u**

$\alpha$ -Gb3Cer (d18:1/26:0)

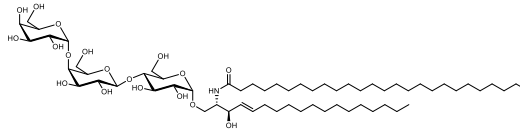

**Galactosyl diacylglycerols; exact mass: 674.5 u**

$\alpha$ -Gal DAG (14:0/14:0)

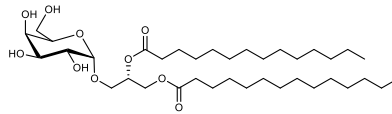

$\beta$ -Gal DAG (14:0/14:0)

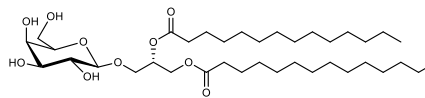

## Ion Mobility-Mass Spectrometry and Tandem Mass Spectrometry

**Supplementary Table 2** CCS of glycolipid adducts obtained from DT-IM-MS measurements (Helium, 2.2 Torr). The values are given in Å<sup>2</sup> (± 1 %). Only sodium adducts of β-Gb3- and β-iGb3 sphingosine and silver adducts of glycosylphytosphingosines exhibit distinguishable CCS. Silver adducts of glycosylphytosphingosines allow for the distinction of α- and β-glycosidic bonds.

| Sample                     | <sup>DT</sup> CCS <sub>He</sub> [M+H] <sup>+</sup> | <sup>DT</sup> CCS <sub>He</sub> [M+Na] <sup>+</sup> | <sup>DT</sup> CCS <sub>He</sub> [M+Ag] <sup>+</sup> |
|----------------------------|----------------------------------------------------|-----------------------------------------------------|-----------------------------------------------------|
| α-GlcCer (d18:1/24:1(15Z)) | 234                                                | 233                                                 | 233                                                 |
| β-GlcCer (d18:1/24:1(15Z)) | 235                                                | 233                                                 | 233                                                 |
| α-GalCer (d18:1/24:1(15Z)) | 235                                                | 235                                                 | 232                                                 |
| β-GalCer (d18:1/24:1(15Z)) | 234                                                | 235                                                 | 233                                                 |
| α-Glc sphingosine          | 153                                                | 158                                                 | 150                                                 |
| β-Glc sphingosine          | 152                                                | 157                                                 | 153                                                 |
| α-Gal sphingosine          | 154                                                | 157                                                 | 151                                                 |
| β-Gal sphingosine          | 153                                                | 158                                                 | 150                                                 |
| α-Glc phytosphingosine     | 160                                                | 163                                                 | 152                                                 |
| β-Glc phytosphingosine     | 161                                                | 164                                                 | 157                                                 |
| α-Gal phytosphingosine     | 160                                                | 162                                                 | 153                                                 |
| β-Gal phytosphingosine     | 161                                                | 164                                                 | 156                                                 |
| α-GlcA phytosphingosine    | 160                                                | 163                                                 | 152                                                 |
| β-GlcA phytosphingosine    | 161                                                | 163                                                 | 156                                                 |
| β-Gb3 sphingosine          | 197                                                | 203                                                 | 198                                                 |
| β-iGb3 sphingosine         | 199                                                | 198                                                 | 196                                                 |
| α-Gb3Cer (d18:1/26:0)      | 281                                                | 283                                                 | 280                                                 |
| α-Gal DAG (14:0/14:0)      | –                                                  | 207                                                 | 202                                                 |
| β-Gal DAG (14:0/14:0)      | –                                                  | 210                                                 | 204                                                 |

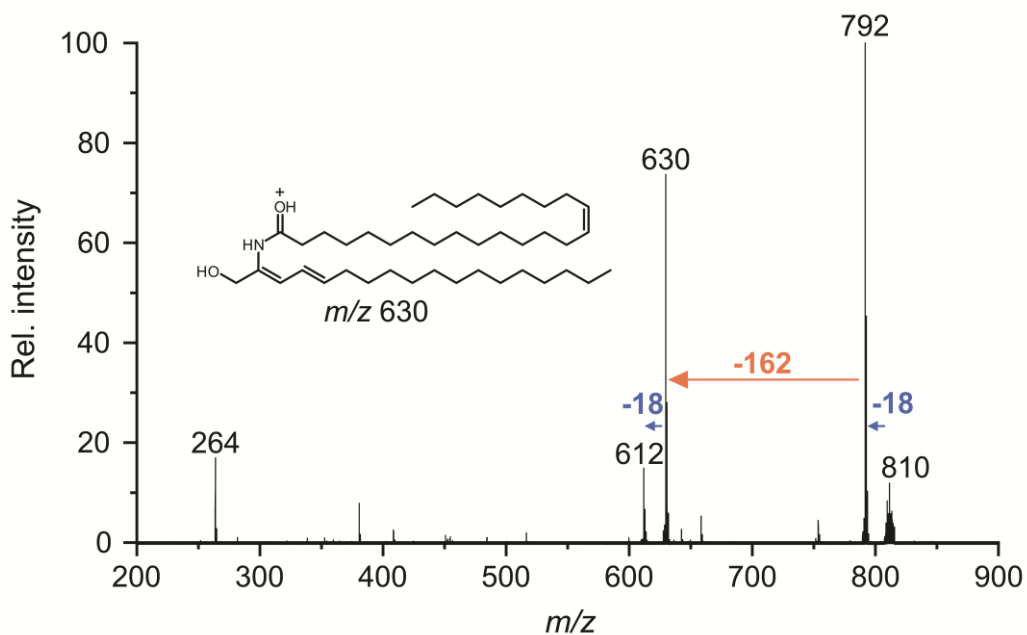

**Supplementary Fig. 1** Exemplary MS/MS spectrum of  $\beta$ -GalCer  $[M+H]^+$  ( $m/z$  810) obtained by CID (20 V acceleration voltage). The main fragments result from water elimination ( $-18$ ) and cleavage of the glycosidic bond ( $-162$ ). The most abundant fragment is dehydrated ceramide ( $m/z$  630, possible structure shown). The fragments yield no stereochemical information about the glycan and the MS/MS spectra of  $\alpha$ - and  $\beta$ -GalCer are identical except for slightly varying relative intensities. Source data are provided as a Source Data file.

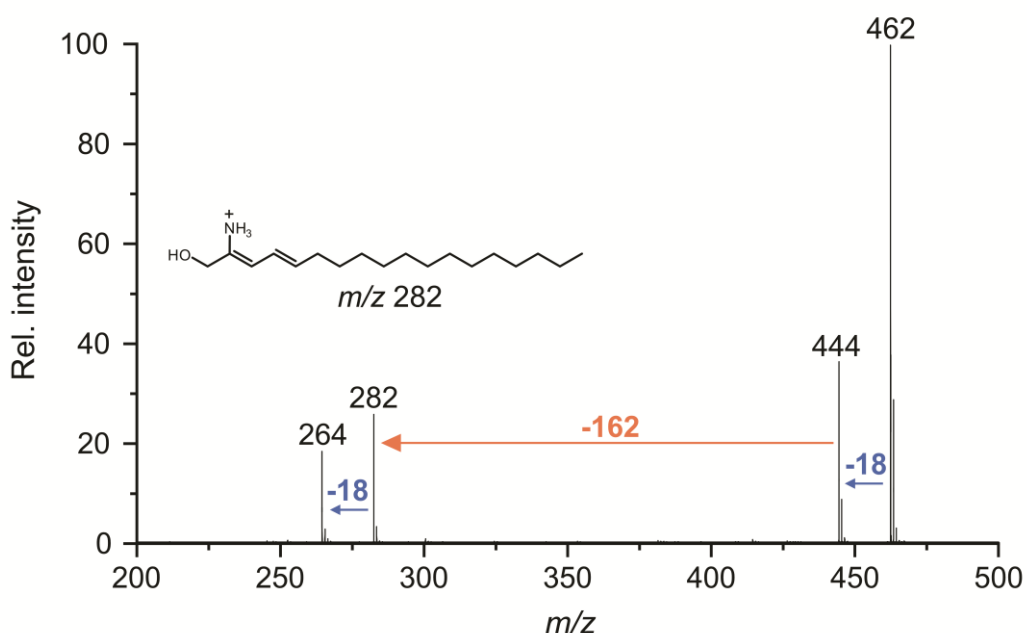

**Supplementary Fig. 2** Exemplary MS/MS spectrum of  $\alpha$ -Glc sphingosine  $[M+H]^+$  ( $m/z$  462) obtained by CID (10 V acceleration voltage). The main fragments result from water elimination and cleavage of the glycosidic bond yielding dehydrated sphingosine ( $m/z$  282, possible structure shown). The fragments yield no stereochemical information about the glycan and the MS/MS spectra of all investigated glycosylsphingosines are indistinguishable. Source data are provided as a Source Data file.

## Supplementary IR Spectra

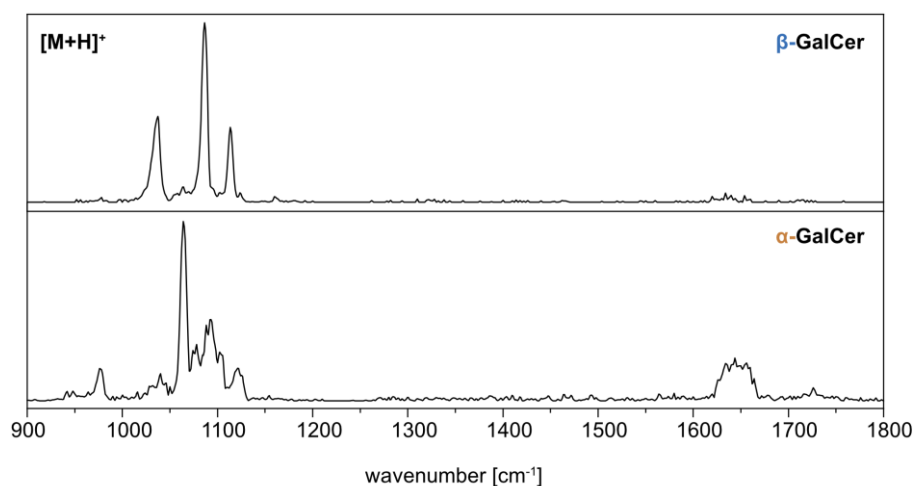

**Supplementary Fig. 3** IR spectra of [M+H]<sup>+</sup> ions of α- and β-GalCer (d18:1/24:1(15Z)). The amide vibrations are partly suppressed compared to the spectra of the sodium adducts. Source data are provided as a Source Data file.

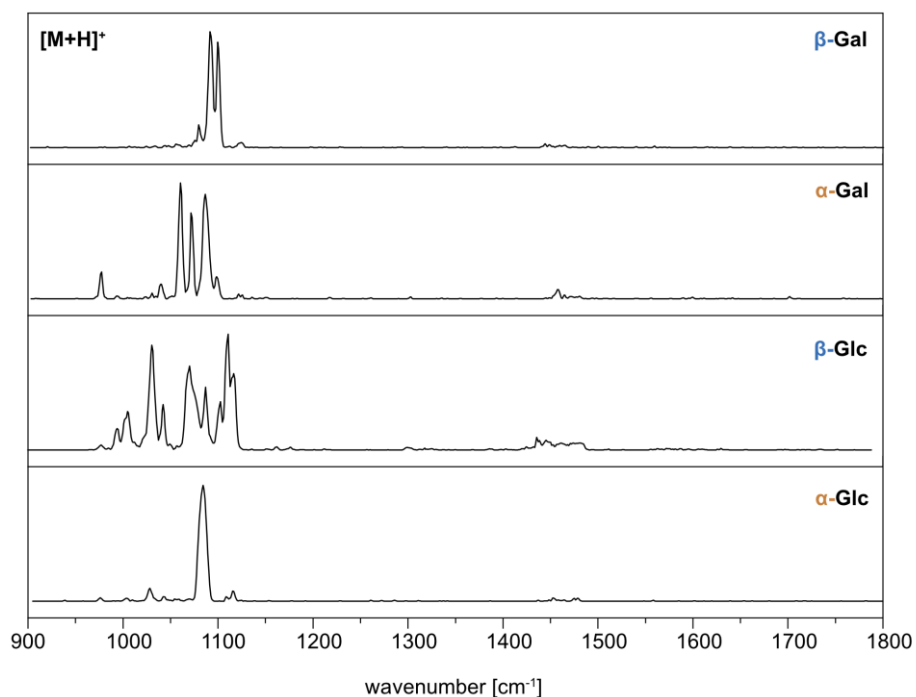

**Supplementary Fig. 4** IR spectra of [M+H]<sup>+</sup> ions of glycosylsphingosines bearing Glc or Gal headgroups. The fingerprint regions are highly diagnostic and well-resolved. Weak NH<sub>3</sub><sup>+</sup> umbrella vibrations occur between 1400 and 1500 cm<sup>-1</sup>. Source data are provided as a Source Data file.

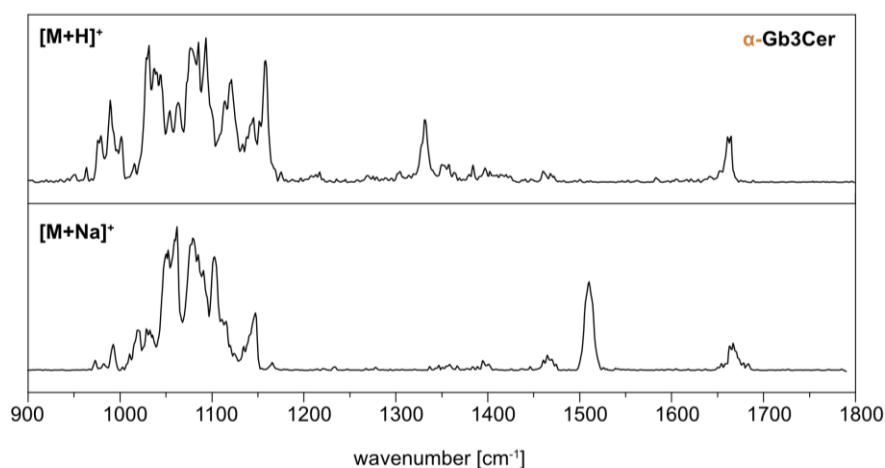

**Supplementary Fig. 5** IR spectra of  $[M+H]^+$  and  $[M+Na]^+$  ions of  $\alpha$ -Gb3Cer (d18:1/26:0). Distinct absorption bands in the fingerprint region are resolved despite the comparably large molecule size. Amide vibrations appear with varying intensity, depending on the cation. Source data are provided as a Source Data file.

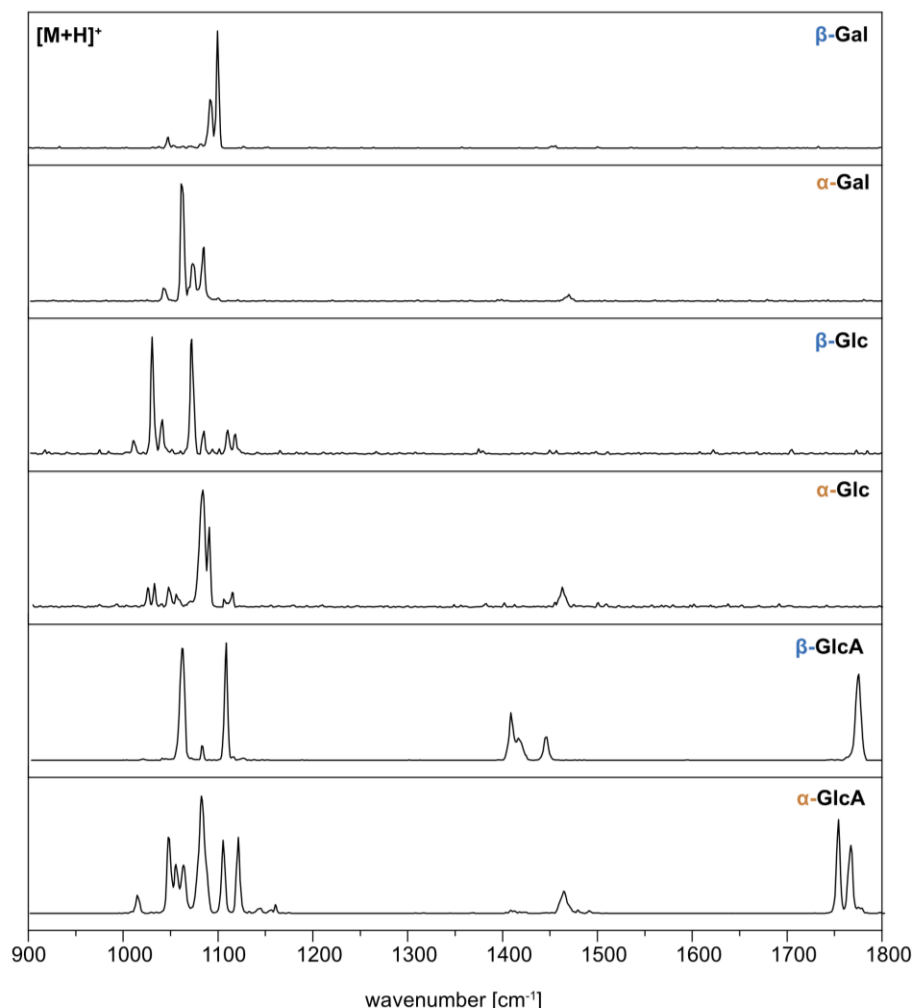

**Supplementary Fig. 6** IR spectra of protonated glycosylphosphosphingosines bearing Glc, Gal or GlcA headgroups. The fingerprint regions are highly diagnostic and well-resolved. Weak NH<sub>3</sub><sup>+</sup> umbrella vibrations occur between 1400 and 1500  $\text{cm}^{-1}$ . The carboxyl groups of the GlcA headgroups yield characteristic C=O stretching vibrations above 1700  $\text{cm}^{-1}$ . Source data are provided as a Source Data file.



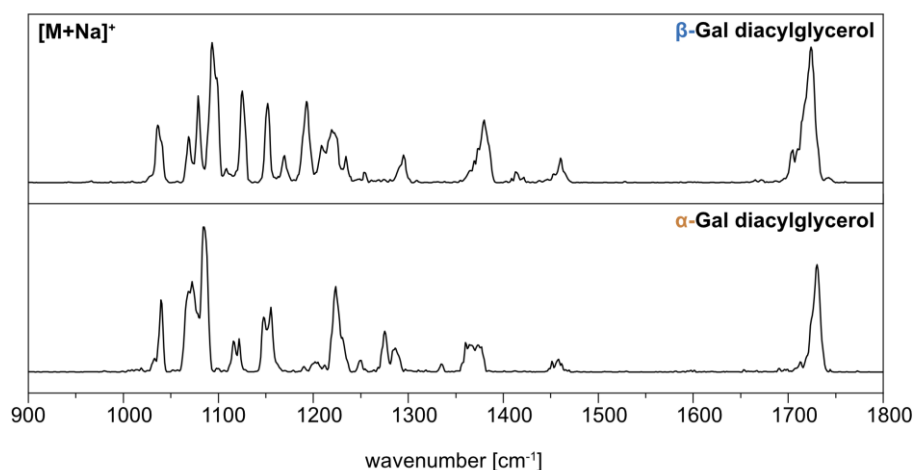

**Supplementary Fig. 7** IR spectra of  $[M+Na]^+$  ions of  $\alpha$ - and  $\beta$ -galactosylglycerolipids (14:0/14:0). Compared to glycosphingolipids, more absorption bands appear above the fingerprint region between 1200 and 1500  $\text{cm}^{-1}$ , and the ester groups yield characteristic C=O stretching vibrations beyond 1700  $\text{cm}^{-1}$ . Source data are provided as a Source Data file.

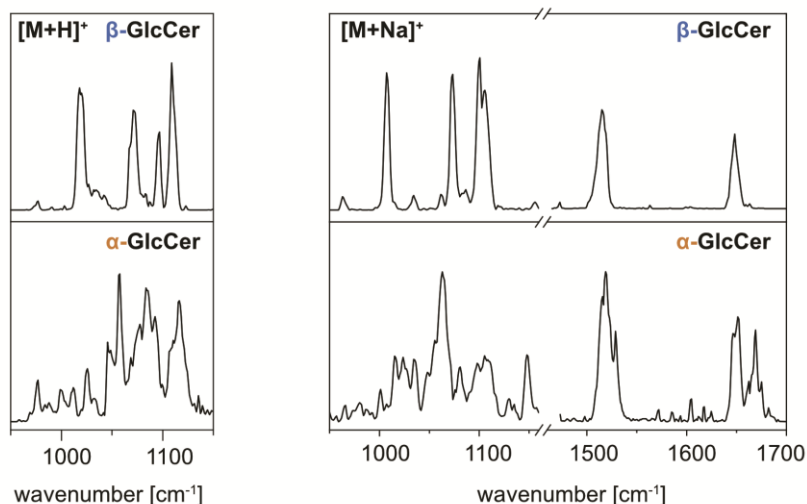

**Supplementary Fig. 8** IR spectra of  $[M+H]^+$  and  $[M+Na]^+$  ions of  $\alpha$ - and  $\beta$ -GlcCer (d18:1/24:1(15Z)) in the fingerprint region and the amide region. The fingerprint region of the sodiated species was employed for deconvolution of biological lipid extracts (*cf.* Supplementary Fig. 20). Source data are provided as a Source Data file.

## Synthetic Mixtures of $\alpha$ - and $\beta$ -GalCer

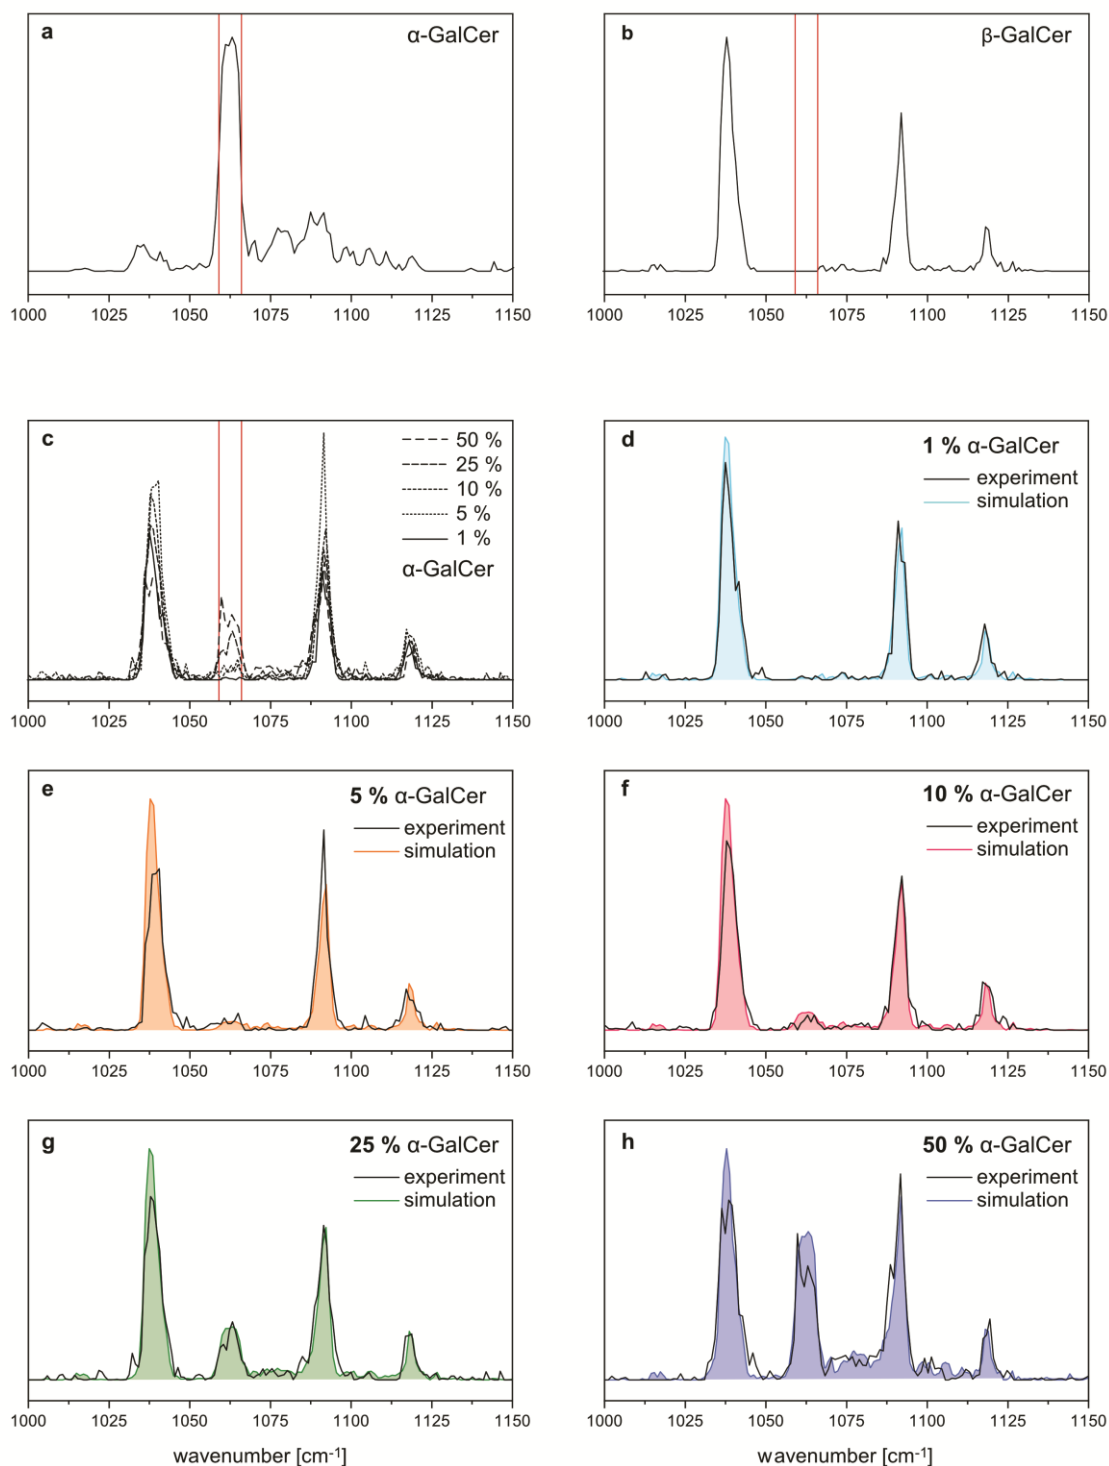

**Supplementary Fig. 9** IR spectra of protonated  $\alpha$ - and  $\beta$ -GalCer in the fingerprint region (1000–1150  $\text{cm}^{-1}$ ). The main absorption bands of the pure isomers do not overlap (**a**, **b**). The decrease of  $\alpha$ -GalCer from 50 % to 5 % is accompanied by a roughly linear decrease of intensity of the absorption band within the set boundaries (1059–1066  $\text{cm}^{-1}$ ). At 1 %,  $\alpha$ -GalCer cannot be detected anymore (**c**). The simulated mixture spectra generated by mathematically averaging the spectra of the pure isomers match the experimental spectra reasonably well (**d**–**h**). All spectra except for (**c**) are normalized. Source data are provided as a Source Data file.

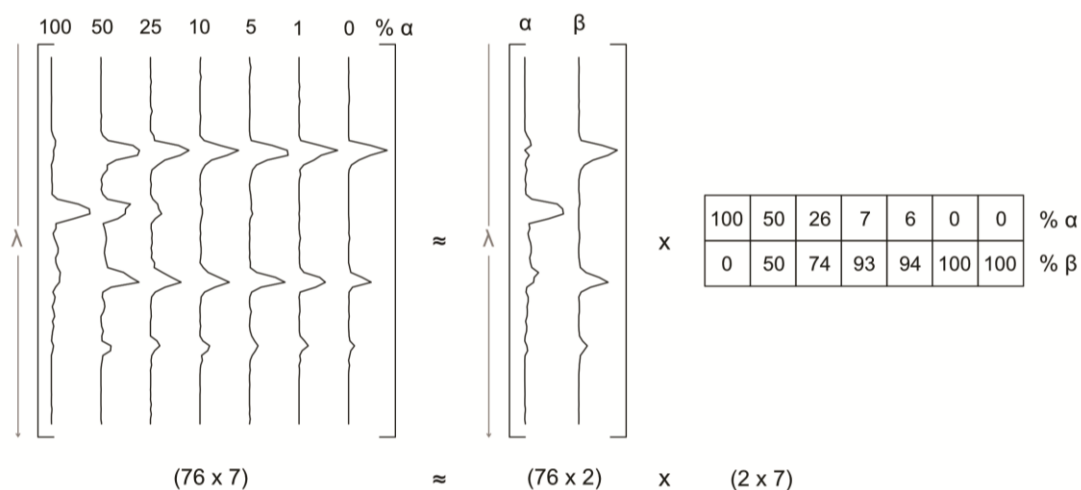

**Supplementary Fig. 10\*** Graphical representation of non-negative matrix factorization (NMF) to deconvolute IR spectra of  $\alpha$ - and  $\beta$ -GalCer. The (76 x 7) input matrix contains the binned experimental spectra from 1000–1150  $\text{cm}^{-1}$ . The expected ratio of  $\alpha$ -GalCer is indicated on top. The output contains the two spectra of pure  $\alpha$ - and  $\beta$ -GalCer in a (76 x 2) matrix multiplied by their relative contributions to each of the input spectra.

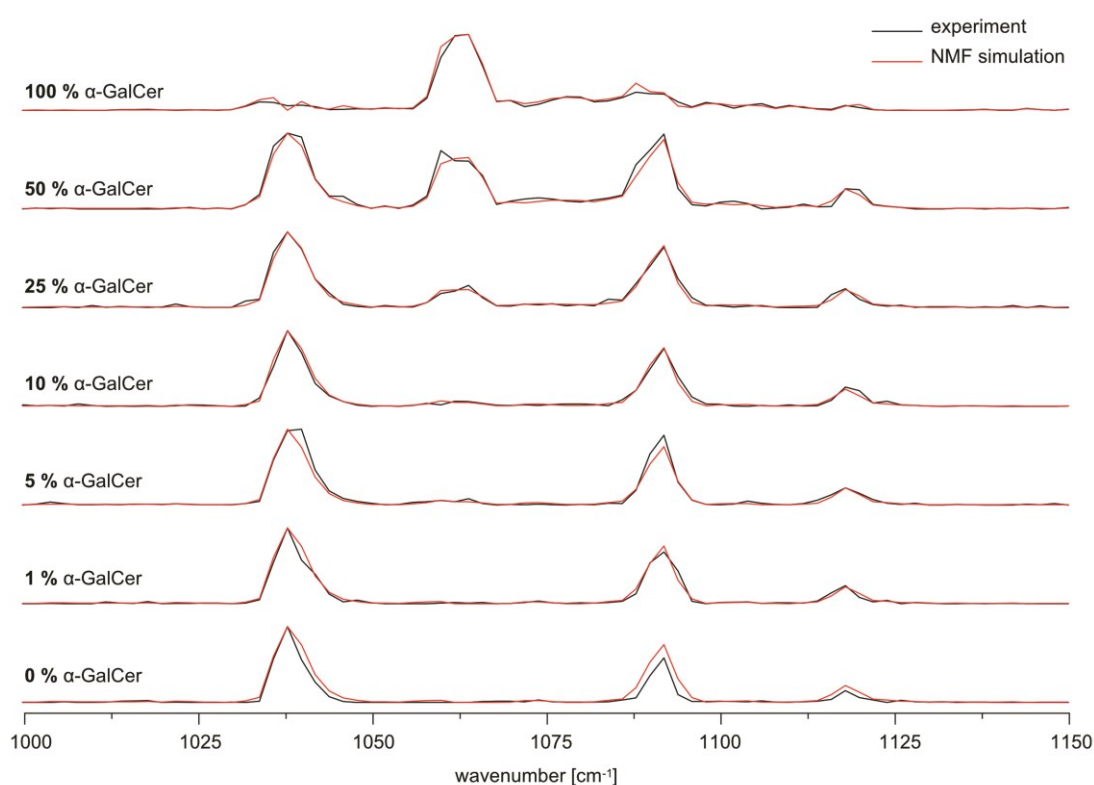

**Supplementary Fig. 11:** Comparison of NMF-simulated spectra of  $\alpha$ - and  $\beta$ -GalCer (red) with the experimental IR spectra (black, input spectra from Supplementary Table 3). The spectra were simulated by matrix factorization of the output matrix (Supplementary Table 3) and the weighting factors depicted in Supplementary Fig. 10. Source data are provided as a Source Data file.

\* The graphical representation of the input- and output IR spectra is based on the data in Supplementary Table 3.

**Supplementary Table 3** Input- and output matrices of NMF containing normalized spectral intensities. Source data are provided as a Source Data file.

| wavenumber                   | 100 % $\alpha$ | 50 % $\alpha$ | 25 % $\alpha$ | 10 % $\alpha$ | 5 % $\alpha$ | 1 % $\alpha$ | 0 % $\alpha$ | $\alpha$ -GalCer              | $\beta$ -GalCer |
|------------------------------|----------------|---------------|---------------|---------------|--------------|--------------|--------------|-------------------------------|-----------------|
| <b>Input Matrix (76 x 7)</b> |                |               |               |               |              |              |              | <b>Output Matrix (76 x 2)</b> |                 |
| 1000                         | 0              | 0             | 0             | 1.987         | 0            | 0            | 0            | 0.324                         | 0               |
| 1002                         | 0              | 1.071         | 0             | 0.656         | 0.890        | 0            | 0            | 0.420                         | 0.177           |
| 1004                         | 0              | 0.203         | 0             | 0.842         | 3.895        | 0.213        | 0            | 0.944                         | 0               |
| 1006                         | 0              | 1.090         | 1.096         | 0.419         | 1.933        | 0            | 0.545        | 0.872                         | 0.088           |
| 1008                         | 0              | 0             | 0             | 3.201         | 0.313        | 0            | 0            | 0.581                         | 0               |
| 1010                         | 0              | 0             | 2.677         | 0.898         | 0.186        | 0            | 0            | 0.642                         | 0               |
| 1012                         | 0              | 0             | 0.262         | 0             | 0.571        | 2.083        | 0.265        | 0.520                         | 0               |
| 1014                         | 0.514          | 0             | 1.230         | 0.383         | 0.183        | 0.433        | 1.278        | 0.528                         | 0.095           |
| 1016                         | 0.812          | 0             | 0.450         | 0             | 0.976        | 0.188        | 1.780        | 0.491                         | 0.166           |
| 1018                         | 1.087          | 0             | 0.115         | 0.286         | 0.889        | 2.447        | 2.152        | 0.911                         | 0.034           |
| 1020                         | 0.191          | 0             | 0.625         | 0             | 0.646        | 0            | 0            | 0.214                         | 0.055           |
| 1022                         | 0              | 0.530         | 4.712         | 0.435         | 1.572        | 0.064        | 0.112        | 1.279                         | 0.077           |
| 1024                         | 0.111          | 1.802         | 0.826         | 1.716         | 0.765        | 0.208        | 0            | 0.822                         | 0.374           |
| 1026                         | 0.101          | 0             | 0.073         | 1.495         | 0.265        | 0.515        | 0            | 0.388                         | 0               |
| 1028                         | 0              | 0.832         | 0.149         | 0.437         | 0.143        | 0.704        | 0            | 0.352                         | 0.126           |
| 1030                         | 0.635          | 0             | 0.087         | 0             | 0.151        | 0            | 0.137        | 0                             | 0.287           |
| 1032                         | 5.054          | 5.301         | 8.701         | 0.218         | 1.617        | 0.511        | 0            | 1.740                         | 4.049           |
| 1034                         | 10.855         | 18.875        | 10.767        | 11.162        | 4.700        | 4.937        | 1.579        | 6.390                         | 9.244           |
| 1036                         | 10.206         | 83.079        | 72.858        | 52.351        | 59.533       | 54.577       | 57.492       | 60.931                        | 11.204          |
| 1038                         | 5.796          | 100           | 100           | 100           | 98.039       | 100          | 100          | 100                           | 0               |
| 1040                         | 6.540          | 94.757        | 77.430        | 70.504        | 100          | 57.633       | 56.184       | 75.741                        | 7.725           |
| 1042                         | 4.548          | 39.544        | 37.784        | 30.224        | 46.085       | 38.663       | 26.642       | 36.566                        | 2.148           |
| 1044                         | 0.472          | 16.827        | 19.402        | 13.651        | 18.511       | 12.363       | 7.478        | 14.840                        | 1.016           |
| 1046                         | 1.150          | 16.455        | 4.209         | 6.106         | 8.387        | 2.102        | 1.197        | 5.718                         | 3.846           |
| 1048                         | 1.928          | 5.879         | 1.490         | 1.325         | 4.584        | 4.476        | 0            | 2.629                         | 1.738           |
| 1050                         | 1.330          | 0.755         | 0.103         | 0             | 2.175        | 0.955        | 0            | 0.547                         | 0.604           |
| 1052                         | 2.467          | 3.847         | 2.607         | 0.538         | 0.091        | 0            | 0            | 0.591                         | 2.347           |
| 1054                         | 2.368          | 0.580         | 1.087         | 0             | 0.802        | 0            | 0            | 0.072                         | 1.316           |
| 1056                         | 1.930          | 5.111         | 0.744         | 1.131         | 3.220        | 0            | 0            | 1.267                         | 2.072           |
| 1058                         | 15.936         | 17.054        | 6.508         | 3.603         | 4.122        | 0            | 0            | 2.089                         | 12.400          |
| 1060                         | 69.815         | 76.955        | 18.713        | 1.855         | 5.636        | 0.616        | 0            | 2.669                         | 56.746          |
| 1062                         | 98.325         | 63.576        | 21.762        | 6.569         | 4.113        | 1.415        | 0            | 0                             | 66.343          |
| 1064                         | 100            | 63.072        | 29.173        | 6.280         | 8.259        | 0.483        | 0            | 0.002                         | 67.799          |
| 1066                         | 58.237         | 44.159        | 12.878        | 3.904         | 2.011        | 1.514        | 0.933        | 0                             | 41.466          |
| 1068                         | 11.913         | 5.750         | 2.252         | 1.375         | 0            | 0            | 1.235        | 0                             | 7.343           |
| 1070                         | 12.403         | 10.030        | 1.752         | 0.971         | 0.625        | 0.065        | 1.282        | 0.078                         | 8.900           |
| 1072                         | 4.664          | 12.837        | 4.551         | 1.786         | 0.403        | 1.440        | 0.632        | 2.187                         | 5.730           |
| 1074                         | 7.971          | 14.461        | 3.412         | 1.027         | 0.960        | 3.437        | 2.896        | 2.413                         | 7.452           |
| 1076                         | 13.480         | 13.134        | 4.937         | 2.089         | 0.362        | 1.127        | 0.750        | 1.029                         | 10.280          |
| 1078                         | 17.892         | 10.274        | 2.055         | 2.980         | 0            | 0.186        | 0.086        | 0                             | 11.454          |
| 1080                         | 17.370         | 9.073         | 3.944         | 2.958         | 0.570        | 1.162        | 0.064        | 0                             | 11.046          |
| 1082                         | 10.952         | 11.731        | 2.249         | 2.137         | 0.177        | 0.799        | 0.362        | 0.647                         | 8.621           |
| 1084                         | 12.059         | 14.195        | 10.964        | 0.516         | 2.324        | 1.456        | 0.511        | 2.490                         | 9.933           |
| 1086                         | 16.448         | 18.077        | 9.797         | 8.531         | 1.920        | 2.884        | 3.046        | 4.129                         | 12.328          |
| 1088                         | 23.603         | 58.481        | 31.496        | 20.995        | 19.179       | 12.902       | 5.968        | 19.150                        | 24.235          |
| 1090                         | 21.561         | 77.617        | 54.664        | 49.164        | 67.319       | 53.761       | 35.103       | 53.025                        | 16.492          |
| 1092                         | 21.434         | 98.957        | 79.805        | 76.250        | 92.087       | 68.444       | 58.700       | 76.216                        | 15.516          |
| 1094                         | 11.064         | 26.901        | 38.166        | 39.116        | 30.186       | 43.335       | 10.295       | 30.839                        | 3.576           |
| 1096                         | 4.278          | 5.443         | 12.831        | 11.980        | 6.060        | 3.096        | 1.159        | 6.322                         | 2.217           |
| 1098                         | 10.114         | 3.781         | 3.188         | 2.946         | 0.717        | 0            | 0.884        | 0.306                         | 5.905           |
| 1100                         | 7.646          | 8.698         | 2.220         | 2.740         | 0.191        | 1.261        | 1.553        | 1.197                         | 5.904           |
| 1102                         | 2.804          | 10.328        | 0.672         | 0.141         | 0.962        | 1.708        | 0.960        | 1.476                         | 4.005           |
| 1104                         | 6.476          | 6.973         | 1.861         | 0             | 4.912        | 2.358        | 0.761        | 1.709                         | 4.560           |
| 1106                         | 8.643          | 0.014         | 2.507         | 0.865         | 2.138        | 0.184        | 1.928        | 0.143                         | 4.001           |
| 1108                         | 2.927          | 0.826         | 0.052         | 0.213         | 0.782        | 1.078        | 0.222        | 0.118                         | 1.506           |
| 1110                         | 6.250          | 2.214         | 0             | 1.955         | 0.247        | 0.978        | 0.146        | 0                             | 3.489           |
| 1112                         | 3.500          | 6.327         | 0             | 0.358         | 1.784        | 0.737        | 0.560        | 0.824                         | 3.253           |
| 1114                         | 1.918          | 2.654         | 0.285         | 0.517         | 6.001        | 3.287        | 1.400        | 2.262                         | 0.725           |
| 1116                         | 1.087          | 2.912         | 17.008        | 7.911         | 13.231       | 14.156       | 3.812        | 10.018                        | 0               |
| 1118                         | 6.004          | 26.343        | 24.842        | 25.245        | 22.444       | 23.817       | 15.364       | 22.303                        | 3.675           |
| 1120                         | 3.461          | 25.339        | 10.843        | 20.363        | 15.438       | 8.161        | 6.002        | 13.424                        | 5.047           |
| 1122                         | 0.502          | 5.620         | 3.855         | 4.230         | 6.894        | 2.093        | 3.079        | 4.281                         | 0.560           |
| 1124                         | 0              | 3.591         | 1.889         | 6.714         | 2.087        | 4.172        | 0            | 3.131                         | 0               |
| 1126                         | 0              | 1.628         | 3.054         | 1.963         | 0.600        | 0            | 2.577        | 1.579                         | 0.120           |
| 1128                         | 0              | 0             | 0.356         | 0.922         | 2.160        | 1.558        | 0.792        | 0.976                         | 0               |
| 1130                         | 0              | 0             | 0.891         | 0.302         | 0            | 0.633        | 0.299        | 0.344                         | 0               |
| 1132                         | 0              | 0             | 1.067         | 0             | 0            | 0            | 0.435        | 0.244                         | 0               |
| 1134                         | 0              | 0.509         | 1.103         | 0.298         | 0.695        | 0            | 0            | 0.438                         | 0.088           |
| 1136                         | 0.363          | 0.594         | 0             | 0.588         | 0.045        | 0.081        | 0.111        | 0.160                         | 0.288           |
| 1138                         | 0.892          | 0             | 0.819         | 0.185         | 0            | 0            | 0.061        | 0.052                         | 0.452           |
| 1140                         | 0              | 0.439         | 0.319         | 0             | 0            | 0.053        | 0            | 0.108                         | 0.126           |
| 1142                         | 0              | 0.298         | 2.500         | 0             | 0            | 0.144        | 0            | 0.470                         | 0.129           |
| 1144                         | 2.082          | 0.822         | 0             | 0             | 0.956        | 0            | 0            | 0                             | 1.196           |
| 1146                         | 0.763          | 0             | 2.360         | 0             | 0.320        | 0            | 0            | 0.349                         | 0.413           |
| 1148                         | 0              | 0.262         | 0             | 0             | 1.868        | 0            | 0            | 0.401                         | 0               |
| 1150                         | 1.088          | 1.887         | 0             | 0.199         | 0            | 0            | 0            | 0.075                         | 1.068           |

## Synthetic Mixtures of Monoglycosyl Phytosphingosines (4 Components)

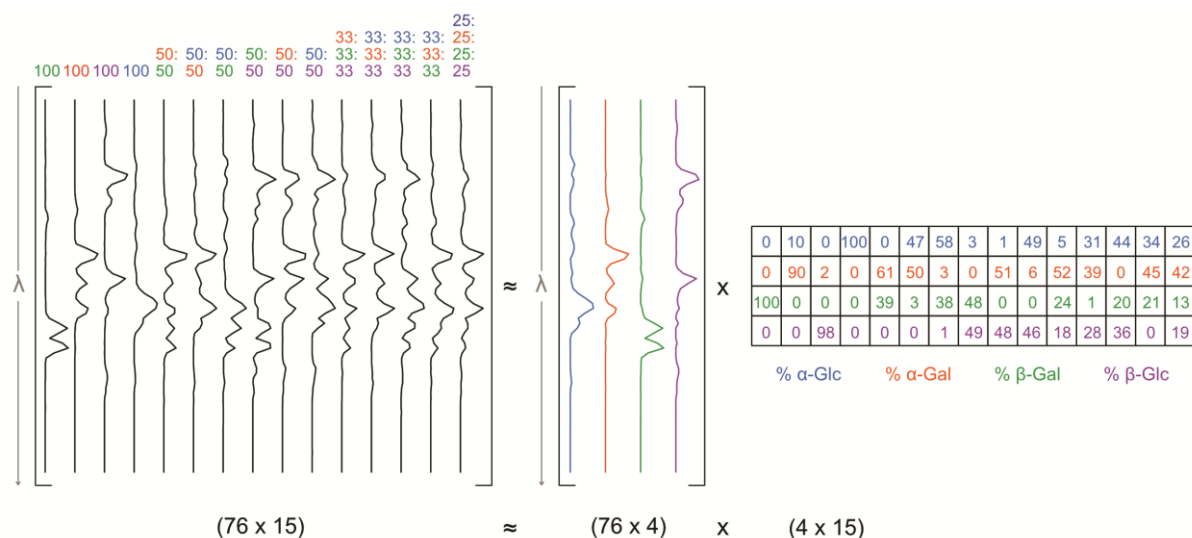

**Supplementary Fig. 12\*** Graphical representation of NMF to deconvolute IR spectra of  $\alpha$ - and  $\beta$ -Glc/Gal phytosphingosine. The (76 x 15) input matrix contains the experimental spectra. The expected ratio of the four isomers is indicated on top. The output contains the four spectra of pure  $\alpha$ - and  $\beta$ -Glc/Gal phytosphingosine in a (76 x 4) matrix multiplied by their relative contributions to each of the input spectra.

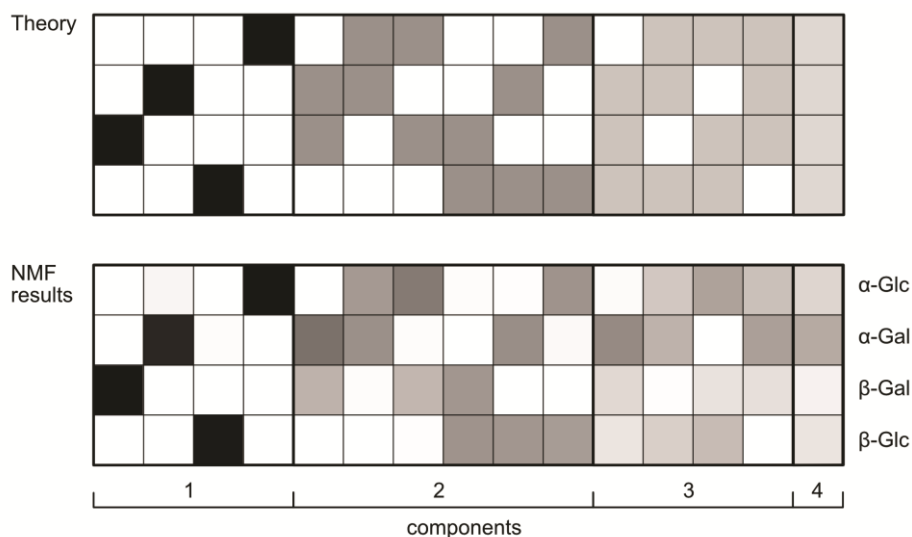

**Supplementary Fig. 13** Heatmap representation of the weighting factors predicted by the mixing ratios (top) and calculated by NMF from the 15 experimental spectra (bottom). The weighting factors in the (4 x 15) matrix from Supplementary Fig. 12 were converted into the corresponding ratio of black and white (white = 0 %, black = 100 % glycolipid).

\* The graphical representation of the input- and output IR spectra is based on the data in Supplementary Tables 4-5.

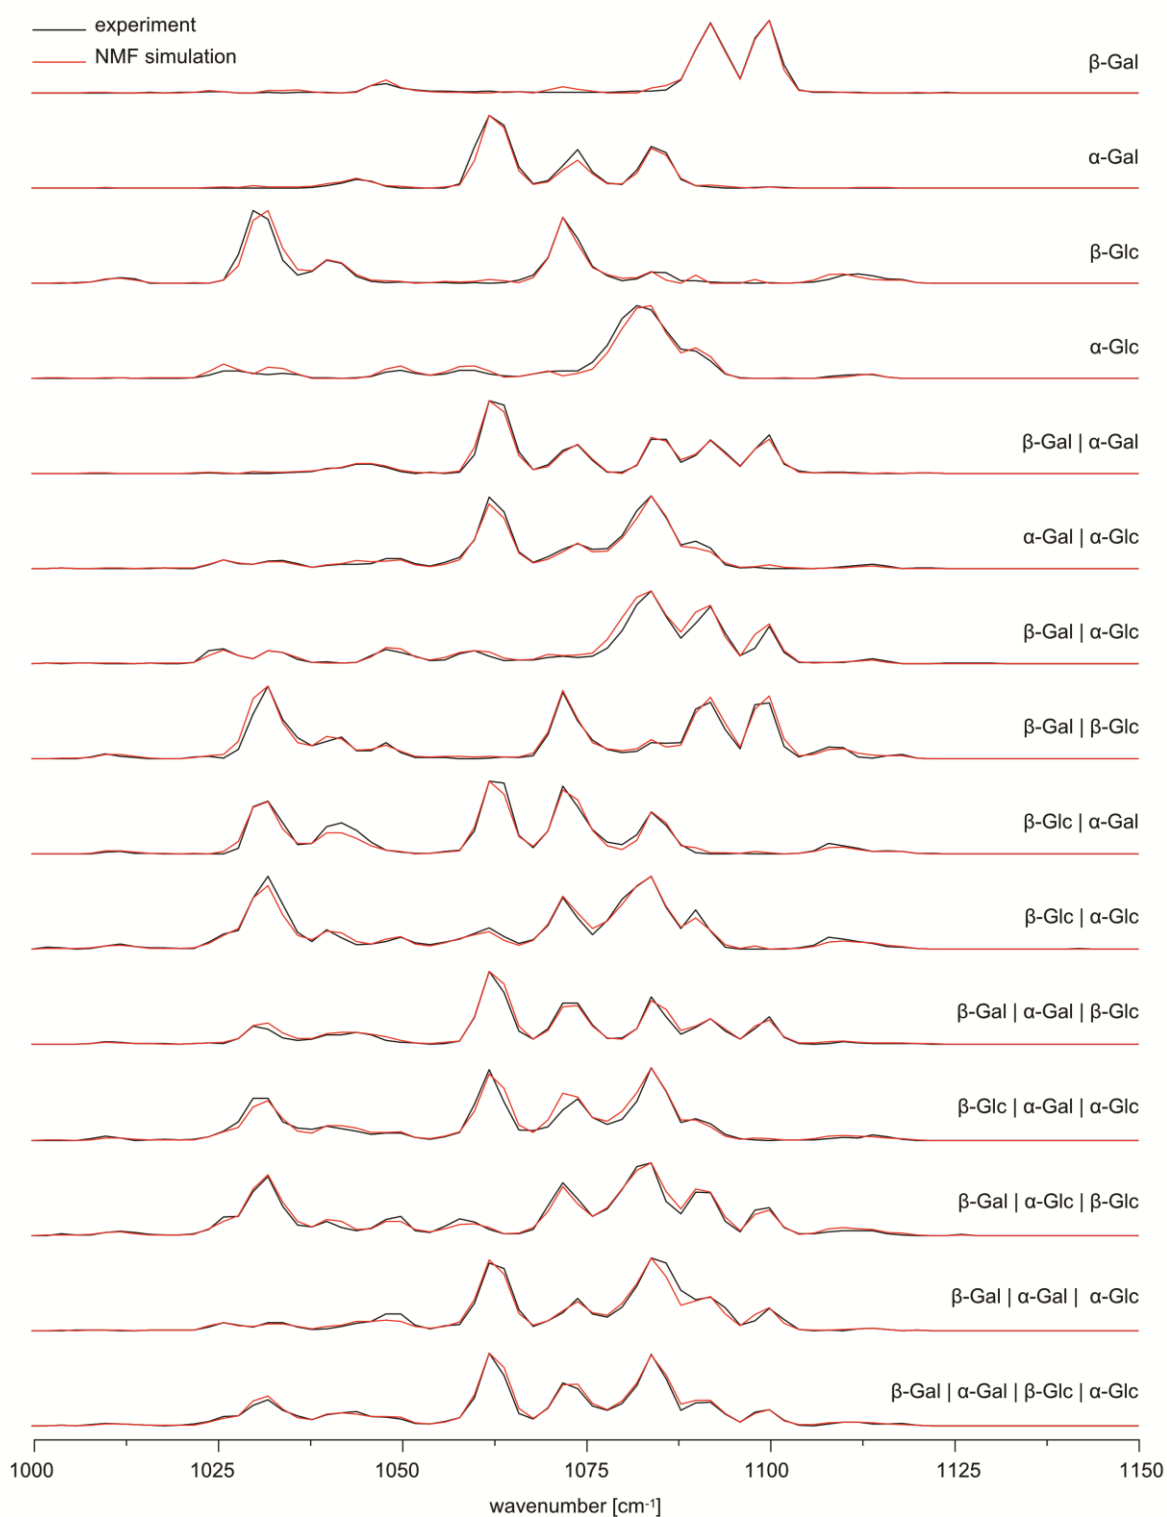

**Supplementary Fig. 14** Comparison of NMF-simulated spectra of Glc/Gal phytosphingosines (red) with the experimental IR spectra (black, input spectra from Supplementary Table 4). The spectra were simulated by matrix factorization of the output matrix (Supplementary Table 5) and the weighting factors given in Supplementary Fig. 12. Source data are provided as a Source Data file.

**Supplementary Table 4** Input matrix for NMF containing normalized spectral intensities. Source data are provided as a Source Data file.

| wn                            | $\beta$ -Gal | $\alpha$ -Gal | $\beta$ -Glc | $\alpha$ -Glc | $\beta$ -Gal<br>$\alpha$ -Gal | $\alpha$ -Gal<br>$\alpha$ -Glc | $\beta$ -Gal<br>$\alpha$ -Glc | $\beta$ -Gal<br>$\beta$ -Glc | $\beta$ -Glc<br>$\alpha$ -Gal | $\beta$ -Glc<br>$\alpha$ -Glc | $\beta$ -Gal<br>$\beta$ -Glc | $\beta$ -Glc<br>$\alpha$ -Gal | $\beta$ -Gal<br>$\alpha$ -Glc | $\beta$ -Gal<br>$\alpha$ -Glc | $\beta$ -Gal<br>$\beta$ -Glc |
|-------------------------------|--------------|---------------|--------------|---------------|-------------------------------|--------------------------------|-------------------------------|------------------------------|-------------------------------|-------------------------------|------------------------------|-------------------------------|-------------------------------|-------------------------------|------------------------------|
| <b>Input Matrix (76 x 15)</b> |              |               |              |               |                               |                                |                               |                              |                               |                               |                              |                               |                               |                               |                              |
| 1000                          | 0            | 0             | 0            | 0.011         | 0                             | 0                              | 0.058                         | 0                            | 0                             | 0                             | 0                            | 0.033                         | 0                             | 0                             | 0                            |
| 1002                          | 0.023        | 0             | 0            | 0.138         | 0                             | 0.325                          | 0.711                         | 0                            | 0                             | 2.234                         | 0                            | 0.139                         | 0.257                         | 0                             | 0.132                        |
| 1004                          | 0.001        | 0             | 0.071        | 0.158         | 0.048                         | 0.830                          | 0.315                         | 0.036                        | 0                             | 1.954                         | 0                            | 0.050                         | 2.266                         | 0                             | 0.532                        |
| 1006                          | 0            | 0             | 0.638        | 0             | 0.007                         | 0.237                          | 0.590                         | 0.255                        | 0                             | 0.064                         | 0.004                        | 0                             | 1.065                         | 0.897                         | 0.328                        |
| 1008                          | 0.011        | 0             | 1.705        | 0.019         | 0                             | 0                              | 0.731                         | 2.416                        | 0                             | 0.728                         | 0.581                        | 2.276                         | 1.224                         | 1.180                         | 2.072                        |
| 1010                          | 0.019        | 0             | 5.106        | 0.337         | 0                             | 0                              | 0.257                         | 6.477                        | 2.505                         | 3.990                         | 3.261                        | 5.690                         | 4.301                         | 0.527                         | 3.772                        |
| 1012                          | 0.104        | 0.031         | 7.997        | 0.770         | 0.035                         | 0                              | 0                             | 3.554                        | 3.121                         | 6.711                         | 2.526                        | 3.093                         | 5.981                         | 0                             | 2.387                        |
| 1014                          | 0.320        | 0.016         | 5.912        | 0.091         | 0.151                         | 0.054                          | 0                             | 2.029                        | 1.211                         | 3.531                         | 0.873                        | 0.307                         | 4.304                         | 0.187                         | 1.713                        |
| 1016                          | 0.467        | 0             | 0.062        | 0.188         | 0.084                         | 0.084                          | 0.525                         | 0.344                        | 0.772                         | 1.548                         | 0.616                        | 0.984                         | 1.780                         | 0.725                         | 1.062                        |
| 1018                          | 0.305        | 0.023         | 0.030        | 0.389         | 0.172                         | 0.655                          | 0.245                         | 0                            | 0.251                         | 1.399                         | 0.749                        | 1.305                         | 0.490                         | 0.960                         | 0.142                        |
| 1020                          | 0.577        | 0.040         | 0.081        | 0.410         | 0.167                         | 0.296                          | 0.258                         | 0                            | 0                             | 0.675                         | 0.289                        | 1.233                         | 0.488                         | 0.594                         | 1.264                        |
| 1022                          | 0.934        | 0             | 0.042        | 0.561         | 0.077                         | 0.160                          | 1.280                         | 2.187                        | 0                             | 0.599                         | 0.504                        | 2.044                         | 2.312                         | 0.442                         | 2.366                        |
| 1024                          | 1.664        | 0.014         | 0.345        | 4.395         | 0.427                         | 5.286                          | 18.270                        | 3.057                        | 0.006                         | 9.256                         | 1.645                        | 5.278                         | 8.415                         | 4.793                         | 6.380                        |
| 1026                          | 1.562        | 0.002         | 4.133        | 10.102        | 0.074                         | 12.240                         | 20.400                        | 1.268                        | 0.141                         | 20.621                        | 0.942                        | 12.588                        | 25.180                        | 11.218                        | 12.512                       |
| 1028                          | 0.254        | 0.007         | 39.020       | 10.386        | 0.019                         | 6.572                          | 11.394                        | 12.612                       | 7.880                         | 25.357                        | 7.512                        | 25.400                        | 26.408                        | 7.968                         | 13.613                       |
| 1030                          | 0.422        | 0.038         | 100          | 6.804         | 0.022                         | 6.257                          | 6.671                         | 61.018                       | 64.681                        | 69.750                        | 25.112                       | 57.890                        | 60.274                        | 5.496                         | 28.559                       |
| 1032                          | 0.529        | 0.014         | 87.493       | 5.082         | 0.008                         | 9.910                          | 18.105                        | 100                          | 72.775                        | 99.384                        | 20.333                       | 57.898                        | 81.068                        | 11.104                        | 36.022                       |
| 1034                          | 0.114        | 0.041         | 31.817       | 6.453         | 1.227                         | 11.247                         | 15.268                        | 53.542                       | 42.669                        | 61.104                        | 8.827                        | 25.406                        | 40.139                        | 11.157                        | 21.153                       |
| 1036                          | 0.536        | 0.008         | 10.725       | 4.775         | 1.925                         | 7.236                          | 5.928                         | 29.225                       | 12.496                        | 23.028                        | 4.911                        | 16.716                        | 14.536                        | 4.710                         | 13.243                       |
| 1038                          | 1.004        | 0.438         | 16.530       | 0.516         | 2.275                         | 1.913                          | 1.797                         | 17.795                       | 14.492                        | 10.104                        | 6.563                        | 14.987                        | 11.553                        | 1.825                         | 8.729                        |
| 1040                          | 0.762        | 3.433         | 31.263       | 0.774         | 7.134                         | 4.516                          | 2.704                         | 23.806                       | 37.295                        | 26.572                        | 12.669                       | 19.950                        | 19.831                        | 2.868                         | 15.445                       |
| 1042                          | 0.375        | 7.164         | 27.667       | 0.280         | 7.274                         | 6.327                          | 1.206                         | 29.846                       | 42.390                        | 15.418                        | 12.588                       | 16.327                        | 11.442                        | 5.784                         | 17.639                       |
| 1044                          | 1.832        | 12.018        | 9.109        | 0.727         | 12.838                        | 6.036                          | 2.061                         | 11.001                       | 32.500                        | 6.360                         | 16.149                       | 12.453                        | 6.417                         | 10.064                        | 19.695                       |
| 1046                          | 10.581       | 9.284         | 2.272        | 2.262         | 12.973                        | 7.214                          | 11.271                        | 10.796                       | 16.086                        | 6.569                         | 12.915                       | 8.717                         | 10.301                        | 13.083                        | 12.696                       |
| 1048                          | 12.969       | 2.180         | 1.030        | 8.598         | 8.265                         | 13.710                         | 19.338                        | 22.580                       | 5.194                         | 9.982                         | 5.469                        | 9.951                         | 22.396                        | 22.793                        | 12.190                       |
| 1050                          | 6.543        | 0.266         | 1.936        | 10.698        | 2.606                         | 13.373                         | 15.405                        | 8.822                        | 2.478                         | 15.887                        | 2.774                        | 10.520                        | 26.403                        | 23.122                        | 9.705                        |
| 1052                          | 4.037        | 0.097         | 0.713        | 6.785         | 0.293                         | 7.021                          | 9.923                         | 2.017                        | 0.544                         | 8.585                         | 1.398                        | 3.948                         | 6.994                         | 7.798                         | 3.182                        |
| 1054                          | 2.947        | 0.029         | 1.201        | 4.248         | 2.016                         | 3.704                          | 4.337                         | 1.751                        | 0.643                         | 6.160                         | 0.262                        | 1.822                         | 3.958                         | 2.976                         | 2.387                        |
| 1056                          | 2.246        | 0.146         | 0.724        | 6.052         | 0.300                         | 8.108                          | 4.981                         | 1.399                        | 3.817                         | 9.023                         | 0.892                        | 5.170                         | 12.515                        | 6.458                         | 6.248                        |
| 1058                          | 1.923        | 6.020         | 0.154        | 11.239        | 2.060                         | 15.607                         | 13.263                        | 0.127                        | 4.783                         | 13.586                        | 4.401                        | 11.085                        | 23.014                        | 8.392                         | 11.129                       |
| 1060                          | 1.822        | 56.294        | 1.221        | 11.038        | 25.614                        | 39.606                         | 17.708                        | 0.039                        | 31.787                        | 21.517                        | 36.871                       | 49.215                        | 19.177                        | 37.698                        | 38.352                       |
| 1062                          | 2.467        | 100           | 0.195        | 6.060         | 100                           | 97.901                         | 9.949                         | 0.928                        | 100                           | 28.893                        | 100                          | 96.984                        | 8.229                         | 92.862                        | 100                          |
| 1064                          | 1.223        | 85.771        | 0.449        | 3.391         | 93.717                        | 77.744                         | 4.656                         | 2.763                        | 97.445                        | 16.722                        | 70.957                       | 53.012                        | 2.890                         | 85.186                        | 68.901                       |
| 1066                          | 1.387        | 28.924        | 4.377        | 2.250         | 29.647                        | 22.671                         | 5.169                         | 1.492                        | 25.339                        | 7.922                         | 18.250                       | 14.919                        | 2.707                         | 28.985                        | 17.155                       |
| 1068                          | 1.072        | 5.960         | 11.463       | 5.971         | 5.406                         | 8.731                          | 5.263                         | 4.567                        | 8.211                         | 12.789                        | 6.699                        | 13.757                        | 8.899                         | 6.219                         | 9.264                        |
| 1070                          | 1.220        | 9.904         | 34.693       | 9.781         | 12.150                        | 15.879                         | 8.543                         | 32.970                       | 31.177                        | 32.487                        | 20.959                       | 19.146                        | 41.040                        | 13.365                        | 25.015                       |
| 1072                          | 1.244        | 30.685        | 90.488       | 9.898         | 31.201                        | 26.597                         | 10.641                        | 91.175                       | 92.892                        | 70.383                        | 56.326                       | 41.708                        | 72.080                        | 24.397                        | 58.494                       |
| 1074                          | 1.085        | 52.536        | 61.620       | 9.813         | 39.067                        | 34.149                         | 8.116                         | 52.062                       | 65.198                        | 42.233                        | 56.425                       | 57.108                        | 50.361                        | 44.359                        | 51.201                       |
| 1076                          | 1.203        | 22.354        | 23.412       | 21.798        | 18.115                        | 26.865                         | 10.379                        | 25.280                       | 33.214                        | 19.858                        | 26.293                       | 31.727                        | 26.103                        | 22.931                        | 27.404                       |
| 1078                          | 0.841        | 6.611         | 10.213       | 45.562        | 1.523                         | 27.687                         | 21.109                        | 12.470                       | 16.531                        | 39.430                        | 7.937                        | 21.783                        | 36.335                        | 18.691                        | 21.702                       |
| 1080                          | 2.035        | 4.855         | 3.785        | 82.283        | 1.953                         | 45.335                         | 45.503                        | 8.212                        | 12.654                        | 68.079                        | 8.852                        | 28.848                        | 63.184                        | 32.631                        | 30.808                       |
| 1082                          | 2.840        | 24.843        | 6.109        | 100           | 11.287                        | 79.181                         | 80.897                        | 10.590                       | 26.761                        | 86.548                        | 20.969                       | 53.320                        | 94.432                        | 61.030                        | 55.380                       |
| 1084                          | 2.319        | 57.566        | 15.238       | 93.933        | 46.988                        | 100                            | 100                           | 21.994                       | 57.078                        | 100                           | 64.989                       | 100                           | 100                           | 100                           | 98.302                       |
| 1086                          | 4.077        | 48.754        | 14.165       | 65.884        | 46.630                        | 69.900                         | 64.560                        | 21.471                       | 39.238                        | 57.193                        | 37.726                       | 67.423                        | 46.867                        | 93.244                        | 64.682                       |
| 1088                          | 18.312       | 12.250        | 3.594        | 39.784        | 15.312                        | 32.824                         | 34.900                        | 22.434                       | 12.960                        | 28.214                        | 14.015                       | 24.362                        | 29.687                        | 55.055                        | 21.433                       |
| 1090                          | 59.558       | 3.532         | 3.220        | 37.456        | 24.913                        | 37.597                         | 55.849                        | 68.053                       | 1.346                         | 53.548                        | 22.940                       | 29.751                        | 59.756                        | 42.968                        | 31.369                       |
| 1092                          | 96.064       | 1.367         | 1.299        | 23.598        | 46.391                        | 28.121                         | 78.752                        | 77.808                       | 0.362                         | 25.157                        | 34.919                       | 22.869                        | 58.642                        | 46.171                        | 32.792                       |
| 1094                          | 57.877       | 0.223         | 0.867        | 6.392         | 28.960                        | 5.130                          | 41.671                        | 39.909                       | 0.104                         | 2.276                         | 17.776                       | 8.383                         | 19.263                        | 31.303                        | 16.045                       |
| 1096                          | 19.595       | 0.314         | 0.611        | 0.600         | 10.287                        | 0.706                          | 11.225                        | 13.441                       | 0.642                         | 0.150                         | 7.044                        | 2.339                         | 4.782                         | 7.933                         | 5.155                        |
| 1098                          | 75.477       | 0.494         | 0.387        | 0.348         | 33.638                        | 1.492                          | 21.131                        | 74.054                       | 0.332                         | 0.074                         | 21.355                       | 0.453                         | 34.699                        | 13.801                        | 19.094                       |
| 1100                          | 100          | 1.397         | 0.859        | 0.087         | 52.480                        | 0.136                          | 51.368                        | 76.432                       | 0.028                         | 0.221                         | 37.247                       | 0.042                         | 38.411                        | 30.932                        | 22.198                       |
| 1102                          | 38.772       | 0.498         | 0.073        | 0.055         | 12.394                        | 0.142                          | 15.730                        | 17.079                       | 0.051                         | 0.141                         | 9.479                        | 0.545                         | 11.311                        | 15.272                        | 7.904                        |
| 1104                          | 4.265        | 0             | 0.629        | 0.025         | 3.168                         | 0.031                          | 1.825                         | 2.786                        | 1.106                         | 1.915                         | 0.461                        | 0.684                         | 2.433                         | 1.575                         | 1.198                        |
| 1106                          | 0.607        | 0.009         | 1.964        | 0.293         | 0.608                         | 0.166                          | 2.023                         | 8.356                        | 4.382                         | 5.080                         | 0                            | 0.687                         | 2.654                         | 0.318                         | 0.351                        |
| 1108                          | 0.713        | 0.032         | 4.859        | 2.371         | 2.072                         | 0.488                          | 2.062                         | 15.967                       | 14.148                        | 16.051                        | 1.132                        | 2.752                         | 4.796                         | 0.473                         | 2.250                        |
| 1110                          | 0.704        | 0.006         | 10.864       | 4.113         | 1.717                         | 2.205                          | 1.910                         | 15.123                       | 11.120                        | 14.055                        | 3.497                        | 4.451                         | 6.684                         | 0.241                         | 5.183                        |
| 1112                          | 0.619        | 0             | 13.210       | 4.889         | 0.623                         | 3.959                          | 4.292                         | 2.704                        | 8.028                         | 10.038                        | 1.665                        | 3.320                         | 7.165                         | 2.508                         | 5.255                        |
| 1114                          | 0.052        | 0             | 10.119       | 5.444         | 0.145                         | 5.882                          | 7.061                         | 1.270                        | 3.380                         | 7.345                         | 1.217                        | 7.389                         | 6.442                         | 3.330                         | 2.710                        |
| 1116                          | 0.008        | 0             | 5.707        | 1.514         | 0.014                         | 3.075                          | 3.689                         | 3.908                        | 4.420                         | 3.564                         | 0.835                        | 5.190                         | 2.746                         | 1.465                         | 2.661                        |
| 1118                          | 0            | 0.005         | 4.903        | 0.246         | 0.209                         | 0.085                          | 0.319                         | 5.562                        | 3.499                         | 2.832                         | 0.516                        | 1.562                         | 0.947                         | 0.331                         | 3.244                        |
| 1120                          | 0.254        | 0.183         | 1.022        | 0             | 0.901                         | 0.453                          | 0.319                         | 1.135                        | 0.510                         | 0.603                         | 0.629                        | 0.184                         | 0.047                         | 0.475                         | 0.644                        |
| 1122                          | 0.350        | 0.351         | 0            | 0             | 0.917                         | 0.788                          | 0.192                         | 0                            | 0.698                         | 0.114                         | 0.030                        | 0.033                         | 0.100                         | 0.380                         | 0                            |
| 1124                          | 0.473        | 0.031         | 0            | 0             | 0.076                         | 0.276                          | 0.819                         | 0.080                        | 0.423                         | 0                             | 0.006                        | 0                             | 0.393                         | 0.070                         | 0.008                        |
| 1126                          | 0.171        | 0             | 0            | 0             | 0.006                         | 0.027                          | 0.524                         | 0.087                        | 0.229                         | 0.191                         | 0.082                        | 0                             | 1.397                         | 0                             | 0.072                        |
| 1128                          | 0            | 0             | 0            | 0.027         | 0.005                         | 0.256                          | 0.651                         | 0.022                        | 0                             | 0.072                         | 0.018                        | 0.059                         | 0.104                         | 0.134                         | 0.035                        |
| 1130                          | 0            | 0.008         | 0            | 0.135         | 0                             | 0.152                          | 0.720                         | 0.094                        | 0.067                         | 0                             | 0                            | 0.146                         | 0                             | 0.123                         | 0.045                        |
| 1132                          | 0            | 0.218         | 0            | 0             | 0                             | 0                              | 0.064                         | 0.011                        | 0.115                         | 0                             | 0                            | 0.015                         | 0                             | 0                             | 0.141                        |
| 1134                          | 0            | 0.364         | 0            | 0             | 0.018                         | 0                              | 0                             | 0                            | 0.008                         | 0                             | 0                            | 0                             | 0                             | 0                             | 0.076                        |
| 1136                          | 0.008        | 0.058         | 0            | 0             | 0.031                         | 0                              | 0                             | 0                            | 0                             | 0.384                         | 0                            | 0.055                         | 0.042                         | 0.043                         | 0.035                        |
| 1138                          | 0.033        | 0             | 0            | 0             | 0                             | 0.119                          | 0                             | 0                            | 0.068                         | 0.115                         | 0                            | 0.017                         | 0.039                         | 0.193                         | 0.105                        |
| 1140                          | 0.058        | 0             | 0            | 0             | 0.095                         | 0                              | 0                             | 0                            | 0.295                         | 0.309                         | 0.012                        | 0.011                         | 0                             | 0.083                         | 0.033                        |
| 1142                          | 0.006        | 0             | 0            | 0.295         | 0                             | 0                              | 0                             | 0                            | 0.068                         | 0.446                         | 0.056                        | 0.124                         | 0.019                         | 0.041                         | 0                            |
| 1144                          | 0            | 0             | 0            | 0.305         | 0.061                         | 0.021                          | 0                             | 0.064                        | 0.018                         | 0                             | 0                            | 0.064                         | 0.082                         | 0.022                         | 0                            |
| 1146                          | 0            | 0             | 0            | 0.018         | 0.078                         | 0.022                          | 0                             | 0.215                        | 0.275                         | 0                             | 0                            | 0.062                         | 0.077                         | 0                             | 0                            |
| 1148                          | 0            | 0             | 0</          |               |                               |                                |                               |                              |                               |                               |                              |                               |                               |                               |                              |

**Supplementary Table 5** Output matrix of NMF containing the spectra of the pure isomers.

| wavenumber                    | $\alpha$ -Glc | $\alpha$ -Gal | $\beta$ -Gal | $\beta$ -Glc |
|-------------------------------|---------------|---------------|--------------|--------------|
| <b>Output Matrix (76 x 4)</b> |               |               |              |              |
| 1000                          | 0             | 0.015         | 0            | 0            |
| 1002                          | 0             | 0.504         | 0            | 0.198        |
| 1004                          | 0             | 0.725         | 0            | 0.374        |
| 1006                          | 0             | 0.305         | 0.160        | 0.176        |
| 1008                          | 0.183         | 0.313         | 0.428        | 1.115        |
| 1010                          | 0.420         | 0.359         | 0.466        | 4.336        |
| 1012                          | 0             | 0.695         | 0            | 4.947        |
| 1014                          | 0             | 0.260         | 0            | 3.008        |
| 1016                          | 0.137         | 0.595         | 0.168        | 0.519        |
| 1018                          | 0.290         | 0.534         | 0            | 0.168        |
| 1020                          | 0.260         | 0.443         | 0.137        | 0.076        |
| 1022                          | 0             | 0.741         | 0.893        | 0.588        |
| 1024                          | 0             | 7.764         | 2.596        | 0.099        |
| 1026                          | 0             | 15.459        | 0.908        | 2.970        |
| 1028                          | 0             | 9.489         | 0            | 18.772       |
| 1030                          | 2.771         | 4.886         | 0            | 66.539       |
| 1032                          | 0             | 12.260        | 2.603        | 77.281       |
| 1034                          | 0.466         | 11.085        | 2.389        | 36.720       |
| 1036                          | 0.893         | 5.046         | 3.038        | 14.368       |
| 1038                          | 2.328         | 0.038         | 1.137        | 13.169       |
| 1040                          | 6.367         | 0             | 0            | 24.704       |
| 1042                          | 8.817         | 0             | 0            | 21.826       |
| 1044                          | 13.390        | 0             | 0.565        | 9.024        |
| 1046                          | 8.650         | 2.473         | 7.535        | 3.077        |
| 1048                          | 2.466         | 10.444        | 12.406       | 2.458        |
| 1050                          | 0.954         | 14.032        | 5.443        | 2.191        |
| 1052                          | 0             | 6.894         | 2.176        | 0            |
| 1054                          | 0             | 3.542         | 1.397        | 0.557        |
| 1056                          | 0.786         | 6.726         | 0.466        | 1.756        |
| 1058                          | 2.802         | 12.749        | 0.412        | 1.496        |
| 1060                          | 36.003        | 13.665        | 0            | 1.321        |
| 1062                          | 100           | 8.504         | 0            | 2.191        |
| 1064                          | 83.434        | 1.099         | 1.458        | 0.634        |
| 1066                          | 23.765        | 2             | 1.428        | 0.260        |
| 1068                          | 4.710         | 4.855         | 0            | 6.153        |
| 1070                          | 7.962         | 8.054         | 2.779        | 26.101       |
| 1072                          | 25.063        | 2.832         | 6.306        | 69.150       |
| 1074                          | 37.988        | 5.390         | 3.328        | 40.423       |
| 1076                          | 18.276        | 10.321        | 1.725        | 15.818       |
| 1078                          | 2.519         | 28.117        | 0            | 9.031        |
| 1080                          | 0             | 54.508        | 0            | 5.436        |
| 1082                          | 11.993        | 77.517        | 0.229        | 6            |
| 1084                          | 46.423        | 80.357        | 4.581        | 11.894       |
| 1086                          | 39.743        | 50.027        | 7.298        | 2.619        |
| 1088                          | 10.558        | 27.926        | 13.467       | 0            |
| 1090                          | 0             | 33.522        | 41.683       | 8.253        |
| 1092                          | 1.435         | 24.284        | 67.944       | 0            |
| 1094                          | 1.985         | 5.733         | 39.721       | 0            |
| 1096                          | 1.107         | 0.282         | 13.222       | 0            |
| 1098                          | 0             | 0             | 52.065       | 4.115        |
| 1100                          | 1.420         | 0.115         | 70.868       | 0            |
| 1102                          | 0.298         | 0.542         | 22.299       | 0            |
| 1104                          | 0.176         | 0.298         | 2.611        | 0.580        |
| 1106                          | 0             | 0.069         | 1.351        | 3.412        |
| 1108                          | 0.008         | 0.809         | 1.191        | 9.054        |
| 1110                          | 0.145         | 1.374         | 0.878        | 9.886        |
| 1112                          | 0.336         | 3.107         | 0            | 6.298        |
| 1114                          | 0.191         | 4.626         | 0            | 3.748        |
| 1116                          | 0.695         | 1.489         | 0            | 3.321        |
| 1118                          | 0.160         | 0             | 0.267        | 3.382        |
| 1120                          | 0.313         | 0             | 0.336        | 0.473        |
| 1122                          | 0.397         | 0             | 0.145        | 0            |
| 1124                          | 0             | 0.160         | 0.267        | 0            |
| 1126                          | 0             | 0.244         | 0.145        | 0.137        |
| 1128                          | 0             | 0.168         | 0.061        | 0            |
| 1130                          | 0             | 0.160         | 0.076        | 0            |
| 1132                          | 0.069         | 0             | 0            | 0.008        |
| 1134                          | 0.069         | 0             | 0            | 0            |
| 1136                          | 0             | 0.061         | 0            | 0.046        |
| 1138                          | 0.046         | 0.046         | 0            | 0.008        |
| 1140                          | 0.046         | 0.023         | 0            | 0.069        |
| 1142                          | 0             | 0.122         | 0            | 0.046        |
| 1144                          | 0             | 0.076         | 0            | 0            |
| 1146                          | 0.031         | 0             | 0.023        | 0.076        |
| 1148                          | 0.061         | 0.023         | 0.008        | 0.053        |
| 1150                          | 0.031         | 0.053         | 0            | 0.122        |



## Biological Application: Glycosylceramides

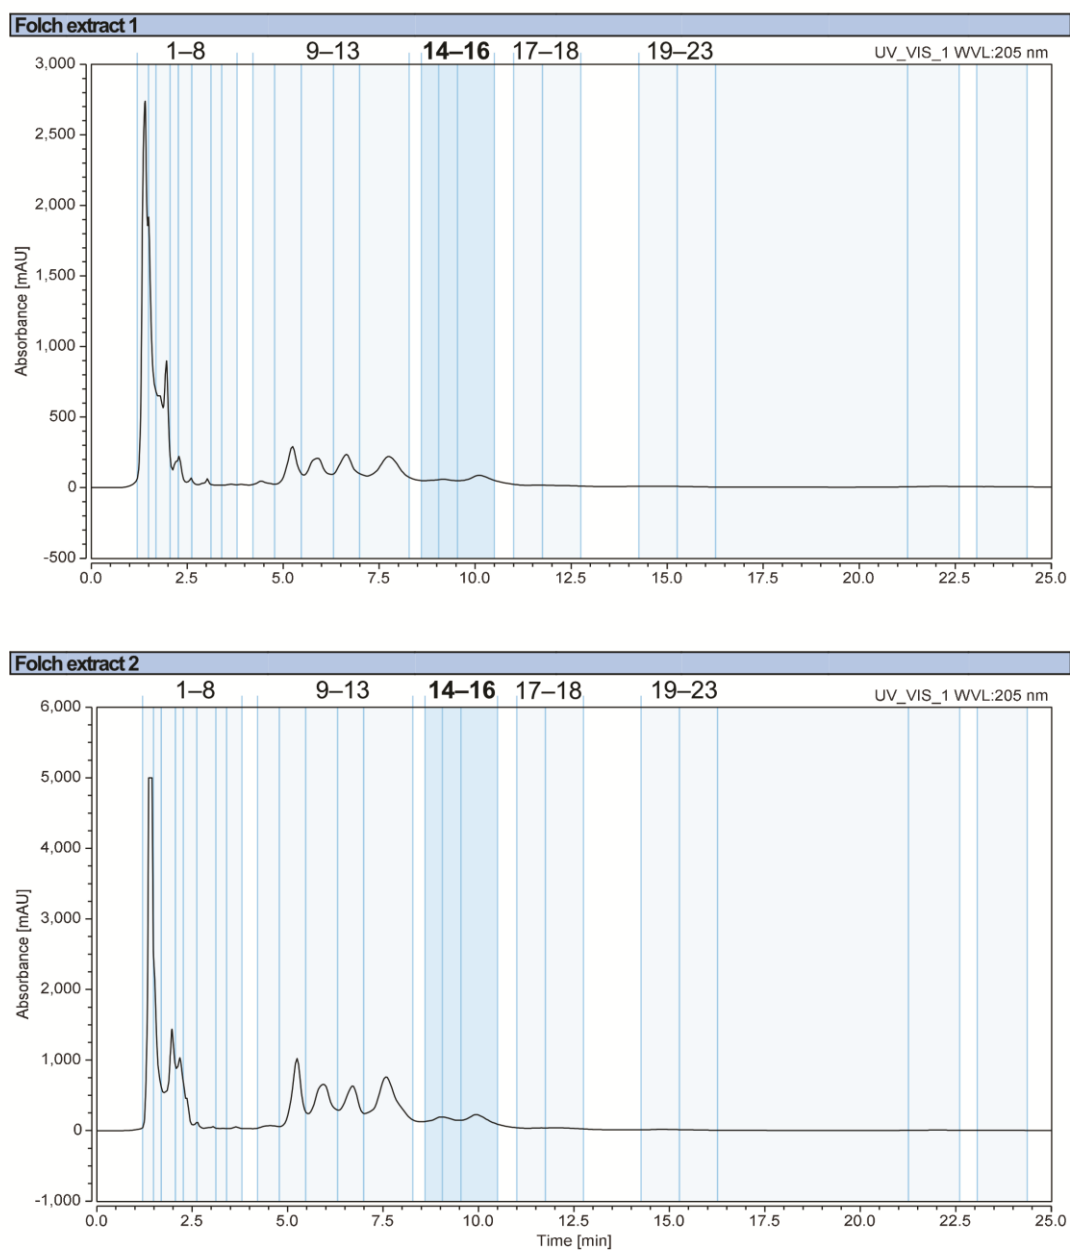

**Supplementary Fig. 15** Reversed-phase HPLC chromatograms of Folch extracts **1** and **2** averaged from four injections. Glycosylceramides (809.7 amu) were detected in both samples in the highlighted fractions 14–16 (most abundant in fraction 15).

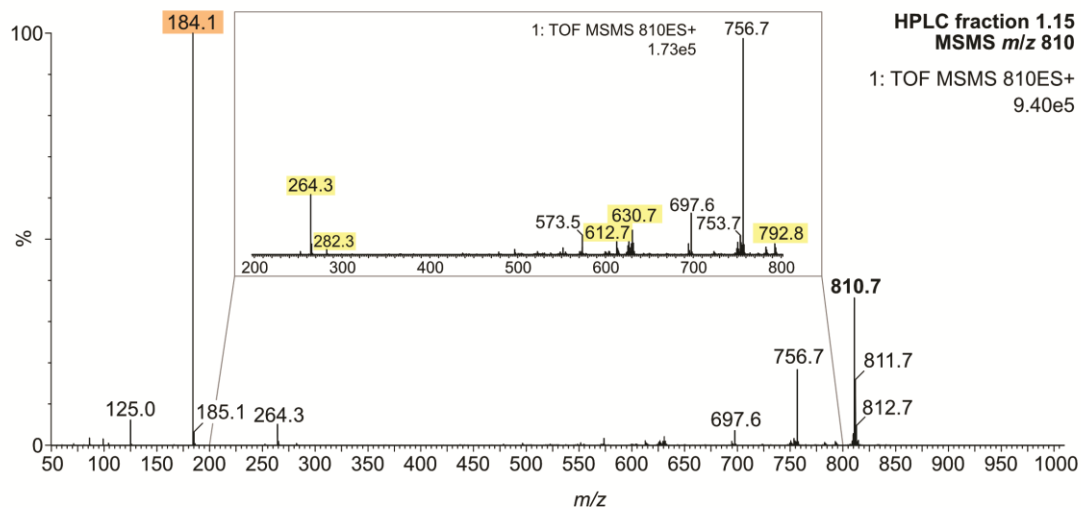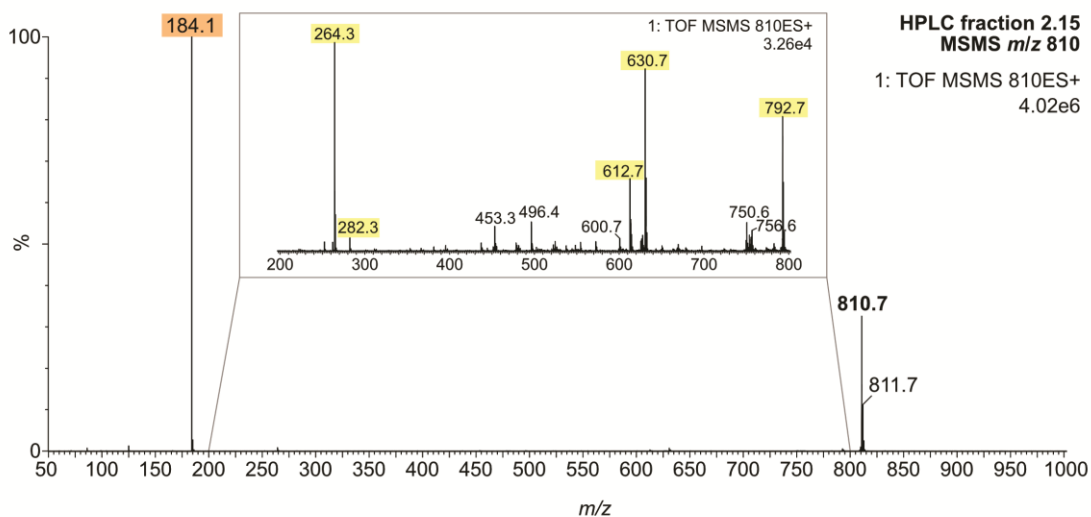

**Supplementary Fig. 16** MS/MS spectra of  $m/z$  810 precursor ions obtained from the HPLC fraction 15 of Folch extracts **1** (top) and **2** (bottom) by CID (25 V acceleration voltage). The main fragment is phosphocholine ( $m/z$  184), originating from protonated phosphatidylcholines. The characteristic fragments of glycosylceramides are highlighted in yellow (*cf.* Supplementary Fig. 1). Source data are provided as a Source Data file.

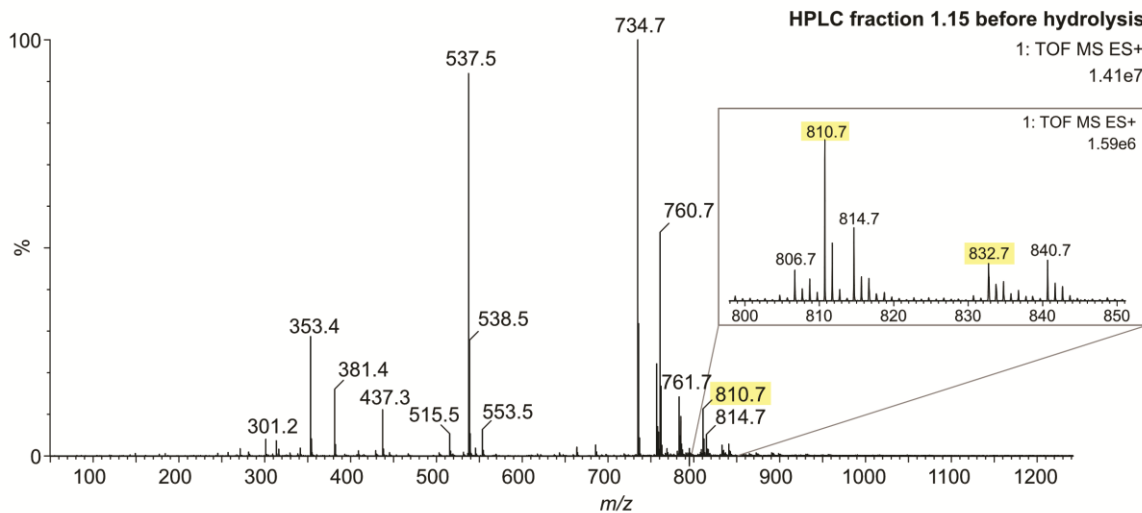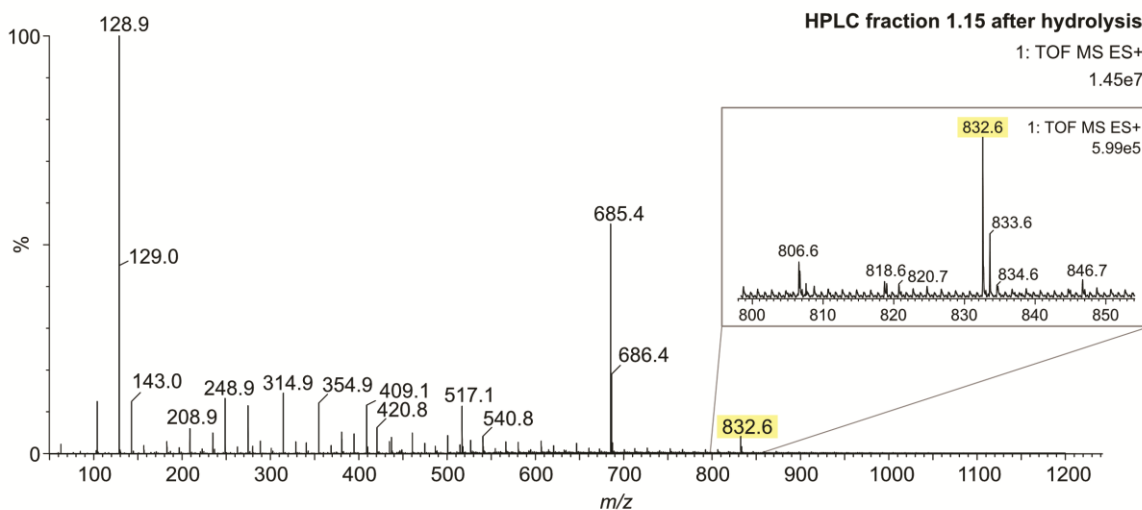

**Supplementary Fig. 17** MS spectra of chromatographic fraction 15 from Folch extract **1** before (top) and after hydrolysis (bottom). Before the hydrolysis, the detection of protonated glycosylceramides ( $m/z$  810) is hindered by isobaric phosphatidylcholines. After the hydrolytic removal of phosphatidylcholines, the  $[M+Na]^+$  adduct of glycosylceramides ( $m/z$  832) can be isolated. Source data are provided as a Source Data file.

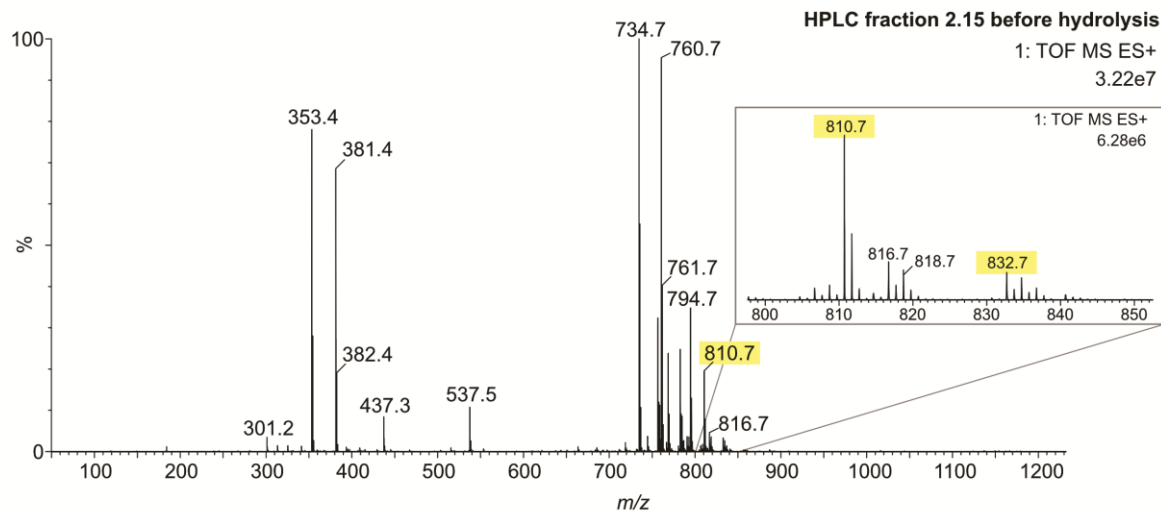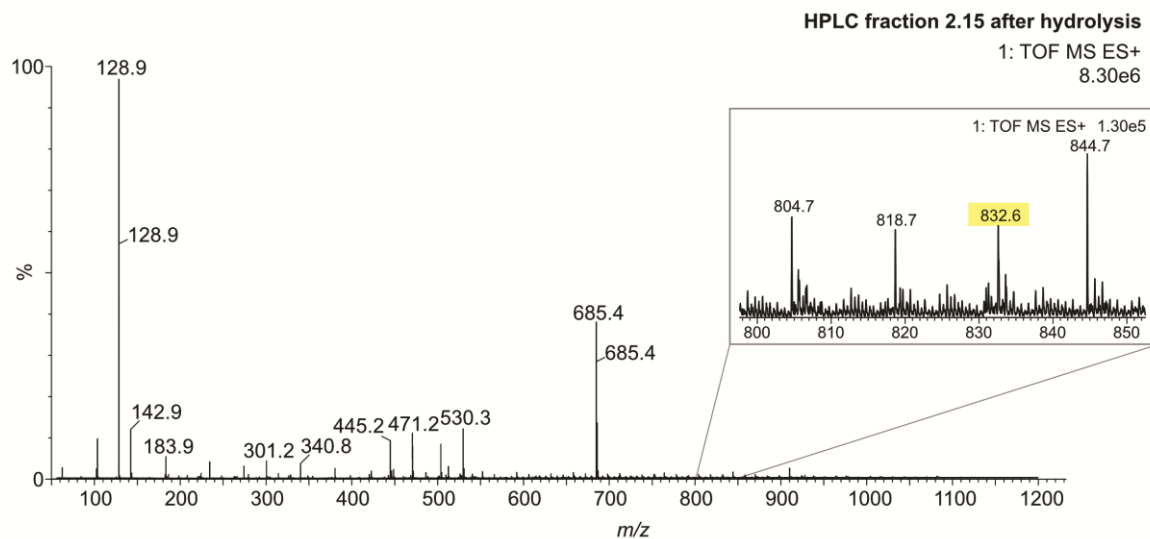

**Supplementary Fig. 18** MS spectra of chromatographic fraction 15 from Folch extract **2** before (top) and after hydrolysis (bottom). Before the hydrolysis, the detection of protonated glycosylceramides ( $m/z$  810) is hindered by isobaric phosphatidylcholines. After the hydrolytic removal of phosphatidylcholines, the  $[M+Na]^+$  adduct of glycosylceramides ( $m/z$  832) can be isolated. Source data are provided as a Source Data file.

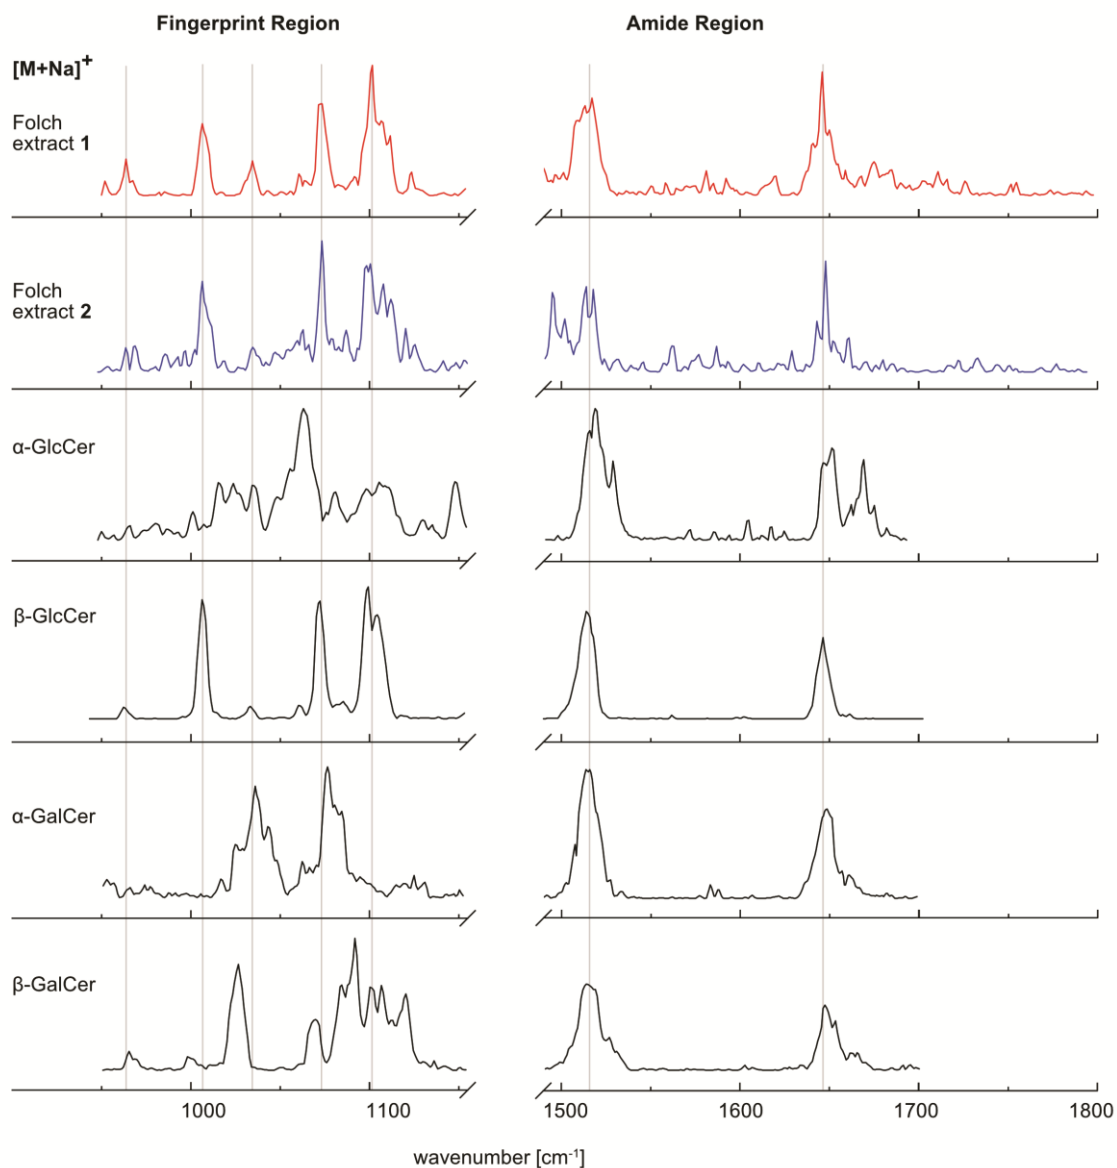

**Supplementary Fig. 19** IR spectra of sodiated glycosylceramides ( $m/z$  832) from Folch extracts **1** (red) and **2** (blue) after hydrolysis, compared with reference spectra of  $\alpha$ - and  $\beta$ -Glc/GalCer. The spectra were recorded in the diagnostic fingerprint region and the amide region. The best spectral match is provided by the reference spectrum of  $\beta$ -GlcCer. Source data are provided as a Source Data file.

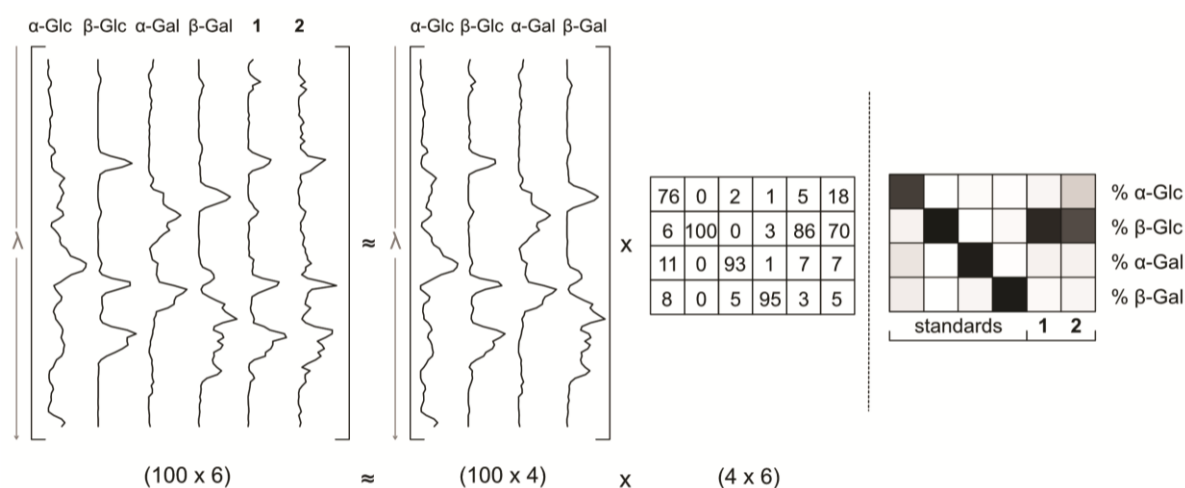

**Supplementary Fig. 20\*** Graphical representation of NMF to deconvolute the IR spectra of of sodiated glycosylceramides (d18:1/24:1) from Folch extracts **1** and **2**. The (100 x 6) input matrix contains experimental spectra of the two biological samples and of the four standards ( $\alpha$ - and  $\beta$ -Glc/GalCer) in the fingerprint region (950–1150  $\text{cm}^{-1}$ ). The output contains the four spectra of  $\alpha$ - and  $\beta$ -Glc/GalCer in a (100 x 4) matrix multiplied by their relative contributions to each of the input spectra. The weighting factors were converted into the corresponding ratio of black and white in the adjacent heatmap representation (white = 0 %, black = 100 % glycolipid).

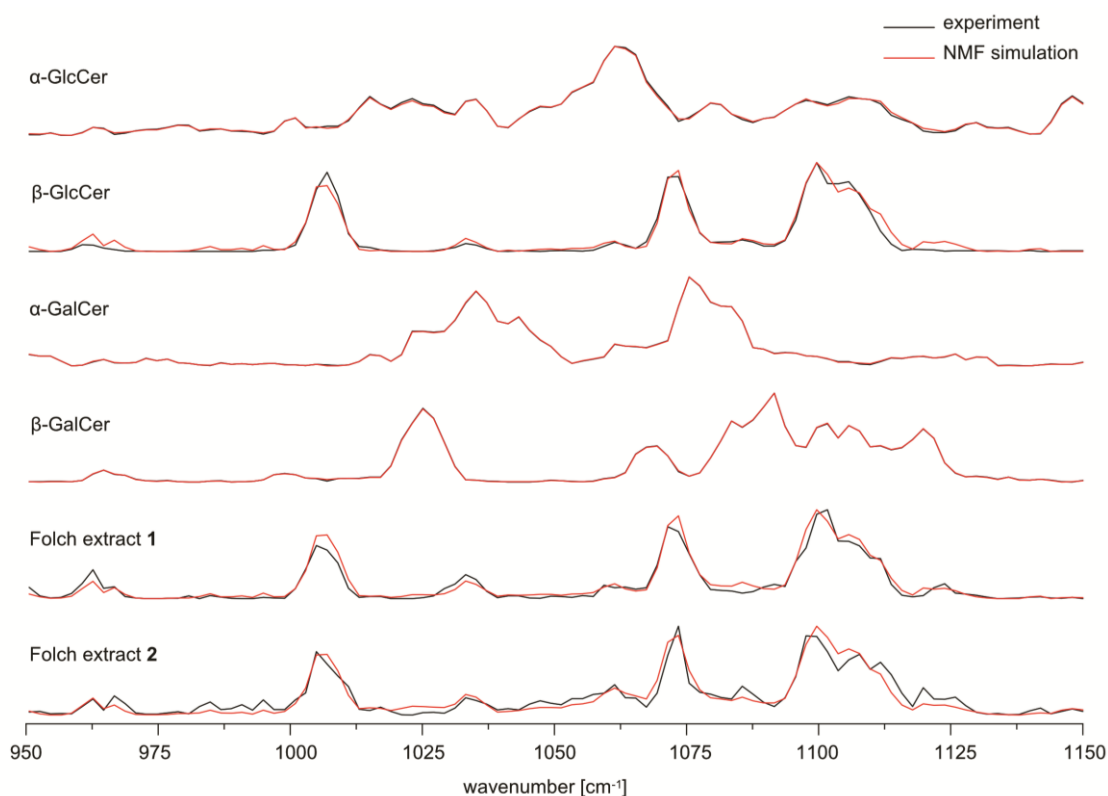

**Supplementary Fig. 21** Comparison of NMF-simulated spectra of synthetic and biological glycosylceramides (red) with the experimental IR spectra (black, input spectra from Supplementary Table 6). The spectra were simulated by matrix factorization of the output matrix (Supplementary Table 6) and the weighting factors depicted in Supplementary Fig. 20. Source data are provided as a Source Data file.

\* The graphical representation of the input- and output spectra is based on the data in Supplementary Table 6.

**Supplementary Table 6** Input- and output matrices of NMF containing normalized spectral intensities. Source data are provided as a Source Data file.

| wavenumber             | $\alpha$ -GlcCer | $\beta$ -GlcCer | $\alpha$ -GalCer | $\beta$ -GalCer | extract 1 | extract 2               | $\alpha$ -GlcCer | $\beta$ -GlcCer | $\alpha$ -GalCer | $\beta$ -GalCer |
|------------------------|------------------|-----------------|------------------|-----------------|-----------|-------------------------|------------------|-----------------|------------------|-----------------|
| Input Matrix (100 x 6) |                  |                 |                  |                 |           | Output Matrix (100 x 4) |                  |                 |                  |                 |
| 952                    | 0.871            | 0.031           | 12.915           | 0.530           | 12.842    | 3.594                   | 0                | 5.200           | 10.393           | 0.133           |
| 954                    | 0.676            | 0.023           | 11.156           | 0.475           | 3.202     | 4.357                   | 0                | 2.141           | 8.905            | 0.213           |
| 956                    | 2.713            | 0.023           | 11.031           | 0.762           | 0.784     | 1.455                   | 0.971            | 0.213           | 8.772            | 0.479           |
| 958                    | 0.004            | 0.069           | 5.742            | 0.770           | 1.372     | 1.835                   | 0                | 0.864           | 4.506            | 0.479           |
| 960                    | 0                | 2.659           | 0.172            | 0.557           | 5.849     | 1.415                   | 0                | 3.564           | 0.106            | 0.293           |
| 962                    | 3.340            | 7.786           | 0.682            | 1.761           | 17.156    | 9.549                   | 1.530            | 12.209          | 0.651            | 1.037           |
| 964                    | 8.908            | 7.166           | 4.711            | 9.148           | 32.514    | 18.149                  | 4.829            | 19.697          | 3.841            | 6.504           |
| 966                    | 8.019            | 3.981           | 7.235            | 13.505          | 11.797    | 5.624                   | 4.084            | 6.690           | 5.263            | 9.988           |
| 968                    | 1.247            | 2.209           | 3.615            | 8.762           | 13.332    | 21.746                  | 0.532            | 12.621          | 2.897            | 6.517           |
| 970                    | 2.529            | 0.493           | 3.183            | 7.701           | 2.418     | 12.935                  | 1.836            | 4.987           | 2.326            | 5.785           |
| 972                    | 5.147            | 0.451           | 3.857            | 3.099           | 1.000     | 2.486                   | 3.579            | 0.811           | 2.897            | 2.261           |
| 974                    | 6.784            | 0.466           | 8.548            | 1.582           | 0         | 1.167                   | 4.404            | 0               | 6.645            | 1.051           |
| 976                    | 6.807            | 0.223           | 5.973            | 1.045           | 0.294     | 1.012                   | 4.750            | 0               | 4.612            | 0.665           |
| 978                    | 9.047            | 0.027           | 7.733            | 1.871           | 0.400     | 2.460                   | 6.453            | 0.027           | 5.981            | 1.277           |
| 980                    | 11.711           | 0.238           | 3.688            | 0.522           | 0.654     | 3.916                   | 9.207            | 0.638           | 2.764            | 0.239           |
| 982                    | 11.239           | 0.253           | 3.033            | 0.100           | 3.072     | 1.678                   | 8.634            | 0.825           | 2.286            | 0               |
| 984                    | 5.024            | 0               | 1.074            | 0.180           | 0         | 9.558                   | 4.577            | 2.793           | 0.851            | 0.080           |
| 986                    | 6.168            | 0.014           | 0.556            | 1.113           | 3.497     | 14.815                  | 5.654            | 5.732           | 0.492            | 0.771           |
| 988                    | 7.355            | 0.090           | 3.391            | 1.353           | 1.830     | 6.376                   | 5.787            | 2.155           | 2.618            | 0.918           |
| 990                    | 4.899            | 0.107           | 2.022            | 0.111           | 0.621     | 7.332                   | 4.178            | 2.288           | 1.608            | 0.013           |
| 992                    | 4.744            | 0.014           | 2.517            | 0.388           | 0         | 11.794                  | 4.324            | 3.511           | 2.020            | 0.239           |
| 994                    | 3.913            | 0.192           | 1.622            | 0.887           | 0         | 5.707                   | 3.286            | 1.636           | 1.236            | 0.625           |
| 996                    | 1.454            | 1.468           | 2.520            | 2.422           | 1.372     | 17.274                  | 1.703            | 6.650           | 2.033            | 1.782           |
| 998                    | 4.665            | 1.479           | 2.908            | 8.413           | 0.752     | 6.186                   | 3.087            | 2.367           | 1.927            | 6.291           |
| 1000                   | 16.270           | 3.010           | 1.405            | 9.725           | 0.642     | 6.193                   | 12.386           | 2.101           | 0.439            | 7.142           |
| 1002                   | 19.580           | 7.363           | 1.007            | 8.475           | 11.383    | 17.148                  | 14.967           | 11.172          | 0.319            | 6.012           |
| 1004                   | 9.430            | 31.827          | 0.566            | 4.504           | 33.356    | 25.057                  | 4.324            | 32.464          | 0.266            | 2.474           |
| 1006                   | 8.829            | 69.563          | 2.009            | 3.836           | 59.744    | 71.198                  | 2.155            | 72.683          | 1.555            | 1.051           |
| 1008                   | 10.247           | 89.057          | 1.011            | 1.306           | 54.553    | 57.559                  | 1.104            | 74.052          | 0.120            | 0               |
| 1010                   | 10.244           | 62.756          | 0.513            | 3.971           | 40.239    | 44.219                  | 3.246            | 53.810          | 0                | 1.370           |
| 1012                   | 16.644           | 19.849          | 1.291            | 4.129           | 11.819    | 32.218                  | 12.812           | 21.718          | 0.651            | 2.487           |
| 1014                   | 31.169           | 5.585           | 5.059            | 4.208           | 1.638     | 6.682                   | 24.147           | 2.500           | 3.309            | 2.700           |
| 1016                   | 43.605           | 4.467           | 12.595           | 5.764           | 2.517     | 5.277                   | 33.181           | 0.692           | 9.091            | 3.724           |
| 1018                   | 35.387           | 1.718           | 11.312           | 5.614           | 2.599     | 9.109                   | 27.207           | 1.569           | 8.307            | 3.764           |
| 1020                   | 29.986           | 0.755           | 5.428            | 18.291          | 0.143     | 4.351                   | 22.285           | 0               | 3.030            | 13.486          |
| 1022                   | 36.997           | 0.454           | 12.912           | 47.458          | 0.220     | 0.474                   | 24.187           | 0               | 7.496            | 35.391          |
| 1024                   | 41.408           | 0.236           | 39.000           | 66.295          | 0.237     | 0                       | 23.123           | 0               | 27.392           | 49.409          |
| 1026                   | 35.558           | 0.251           | 39.152           | 82.792          | 1.115     | 2.976                   | 17.681           | 0               | 27.033           | 62.084          |
| 1028                   | 33.938           | 0.903           | 37.880           | 71.659          | 3.297     | 3.262                   | 17.482           | 0               | 26.634           | 53.705          |
| 1030                   | 26.662           | 2.532           | 38.837           | 44.772          | 11.233    | 2.313                   | 13.291           | 1.889           | 28.894           | 33.370          |
| 1032                   | 23.819           | 4.634           | 51.391           | 17.374          | 16.444    | 8.033                   | 11.521           | 6.796           | 40.257           | 12.422          |
| 1034                   | 38.395           | 9.164           | 70.653           | 2.577           | 27.202    | 19.570                  | 22.018           | 14.896          | 56.246           | 0.745           |
| 1036                   | 40.626           | 7.141           | 83.932           | 2.181           | 21.658    | 16.478                  | 22.644           | 10.480          | 66.759           | 0.412           |
| 1038                   | 27.625           | 3.381           | 71.206           | 1.035           | 8.498     | 12.346                  | 14.408           | 4.229           | 56.645           | 0               |
| 1040                   | 10.386           | 0.389           | 50.154           | 0.780           | 1.034     | 5.926                   | 3.100            | 0.160           | 39.978           | 0.146           |
| 1042                   | 8.665            | 0.201           | 47.501           | 0.215           | 3.130     | 7.448                   | 2.022            | 1.556           | 37.945           | 0               |
| 1044                   | 18.495           | 0.863           | 55.164           | 0.094           | 3.372     | 5.870                   | 8.901            | 0.386           | 43.872           | 0               |
| 1046                   | 26.897           | 0.635           | 40.184           | 0.042           | 0.792     | 12.279                  | 17.934           | 1.357           | 31.765           | 0               |
| 1048                   | 32.014           | 0.250           | 29.165           | 0.990           | 0.602     | 16.084                  | 23.562           | 2.367           | 22.900           | 0.226           |
| 1050                   | 31.517           | 0.951           | 21.985           | 2.204           | 3.001     | 13.415                  | 23.495           | 2.859           | 17.118           | 1.157           |
| 1052                   | 35.339           | 1.149           | 10.440           | 1.635           | 2.563     | 11.770                  | 27.779           | 2.301           | 7.815            | 0.758           |
| 1054                   | 48.264           | 0.908           | 2.756            | 0.780           | 1.461     | 18.647                  | 39.673           | 3.391           | 1.528            | 0.040           |
| 1056                   | 54.097           | 0.625           | 5.639            | 0.457           | 3.575     | 18.450                  | 43.944           | 3.431           | 3.775            | 0               |
| 1058                   | 59.432           | 1.618           | 7.684            | 1.194           | 2.611     | 23.174                  | 48.281           | 4.602           | 5.303            | 0.186           |
| 1060                   | 83.982           | 5.977           | 10.125           | 4.021           | 15.113    | 24.826                  | 66.654           | 9.443           | 6.871            | 1.875           |
| 1062                   | 100              | 10.210          | 24.479           | 5.153           | 12.498    | 34.143                  | 78.309           | 11.664          | 17.982           | 2.407           |
| 1064                   | 98.785           | 7.210           | 22.187           | 10.792          | 13.024    | 19.515                  | 76.406           | 5.799           | 15.869           | 6.770           |
| 1066                   | 90.907           | 3.462           | 21.690           | 31.617          | 10.642    | 19.150                  | 69.036           | 3.591           | 14.753           | 22.783          |
| 1068                   | 61.718           | 11.207          | 20.571           | 39.359          | 12.574    | 8.917                   | 43.585           | 6.105           | 13.809           | 28.808          |
| 1070                   | 46.587           | 36.789          | 24.246           | 40.616          | 37.544    | 24.742                  | 28.378           | 31.746          | 17.012           | 29.233          |
| 1072                   | 32.792           | 83.770          | 28.339           | 29.324          | 80.870    | 67.293                  | 14.063           | 81.673          | 21.172           | 19.564          |
| 1074                   | 15.862           | 84.250          | 66.813           | 11.881          | 75.573    | 100                     | 0                | 91.289          | 53.149           | 6.278           |
| 1076                   | 20.198           | 52.869          | 100              | 6.627           | 50.452    | 35.979                  | 0                | 46.815          | 79.491           | 2.780           |
| 1078                   | 27.684           | 20.778          | 89.920           | 10.496          | 26.775    | 25.758                  | 10.125           | 21.599          | 71.304           | 6.517           |
| 1080                   | 36.171           | 10.344          | 71.806           | 27.080          | 10.216    | 23.497                  | 19.424           | 10.334          | 55.861           | 19.471          |
| 1082                   | 34.662           | 10.560          | 67.394           | 46.541          | 9.434     | 20.002                  | 17.069           | 8.911           | 51.475           | 34.301          |
| 1084                   | 23.865           | 11.075          | 66.634           | 68.672          | 8.718     | 18.051                  | 6.719            | 8.698           | 50.066           | 51.245          |
| 1086                   | 17.934           | 13.029          | 50.535           | 61.551          | 6.439     | 32.404                  | 5.162            | 14.537          | 37.626           | 45.978          |
| 1088                   | 14.432           | 10.554          | 20.648           | 69.822          | 8.123     | 23.691                  | 4.563            | 12.289          | 13.437           | 52.535          |
| 1090                   | 19.004           | 6.228           | 18.956           | 84.432          | 12.972    | 14.389                  | 6.852            | 8.631           | 11.483           | 63.654          |
| 1092                   | 20.759           | 6.293           | 14.123           | 100             | 16.229    | 9.715                   | 7.171            | 8.033           | 6.951            | 75.477          |
| 1094                   | 28.177           | 12.529          | 15.138           | 62.698          | 13.835    | 19.653                  | 16.005           | 13.020          | 9.131            | 46.922          |
| 1096                   | 35.133           | 35.261          | 14.297           | 41.040          | 41.633    | 42.917                  | 21.367           | 39.859          | 9.503            | 29.765          |
| 1098                   | 39.277           | 76.518          | 11.557           | 39.018          | 56.936    | 89.109                  | 23.881           | 77.337          | 7.124            | 27.278          |
| 1100                   | 37.534           | 100             | 10.876           | 61.114          | 94.756    | 88.452                  | 16.790           | 100             | 5.874            | 43.385          |
| 1102                   | 34.677           | 76.468          | 8.073            | 65.669          | 100       | 71.273                  | 15.047           | 86.833          | 3.934            | 47.348          |
| 1104                   | 39.076           | 76.226          | 4.885            | 49.695          | 64.990    | 49.807                  | 20.568           | 66.990          | 1.143            | 35.365          |
| 1106                   | 43.384           | 78.492          | 4.815            | 63.572          | 64.437    | 62.320                  | 23.735           | 71.353          | 0.478            | 45.832          |
| 1108                   | 41.355           | 63.856          | 2.360            | 57.299          | 59.279    | 68.436                  | 24.666           | 65.926          | 0                | 41.390          |
| 1110                   | 40.440           | 44.800          | 1.491            | 39.591          | 45.746    | 51.461                  | 26.555           | 48.052          | 0                | 28.422          |
| 1112                   | 35.531           | 22.861          | 4.958            | 40.570          | 45.230    | 59.348                  | 24.759           | 41.907          | 2.512            | 29.712          |
| 1114                   | 22.618           | 8.257           | 8.905            | 36.314          | 16.149    | 45.316                  | 16.125           | 21.772          | 5.715            | 27.065          |
| 1116                   | 17.882           | 1.341           | 8.449            | 38.815          | 3.790     | 24.553                  | 12.040           | 7.900           | 5.064            | 29.220          |

|      |        |       |        |        |        |        |        |        |        |        |
|------|--------|-------|--------|--------|--------|--------|--------|--------|--------|--------|
| 1118 | 13.762 | 2.389 | 10.222 | 47.699 | 2.127  | 9.751  | 6.865  | 2.886  | 5.994  | 35.990 |
| 1120 | 5.003  | 2.356 | 10.832 | 59.902 | 3.717  | 30.878 | 0.213  | 10.972 | 6.326  | 45.366 |
| 1122 | 3.128  | 1.977 | 9.128  | 49.054 | 12.313 | 18.338 | 0      | 9.855  | 5.276  | 36.947 |
| 1124 | 3.197  | 0.617 | 10.033 | 21.494 | 16.786 | 18.023 | 0.173  | 11.424 | 7.523  | 16.146 |
| 1126 | 5.297  | 0.851 | 13.360 | 10.143 | 6.350  | 20.299 | 3.033  | 8.459  | 10.446 | 7.528  |
| 1128 | 12.239 | 0.749 | 6.962  | 6.004  | 5.346  | 10.805 | 9.047  | 4.602  | 5.290  | 4.349  |
| 1130 | 14.561 | 0.800 | 9.986  | 6.666  | 3.905  | 3.338  | 10.098 | 1.330  | 7.549  | 4.801  |
| 1132 | 9.326  | 0.992 | 9.723  | 5.489  | 1.698  | 1.222  | 5.947  | 0.319  | 7.403  | 3.977  |
| 1134 | 8.369  | 0.808 | 0.461  | 3.267  | 0.138  | 1.976  | 6.519  | 0.346  | 0.093  | 2.367  |
| 1136 | 9.116  | 0.430 | 0.687  | 5.726  | 0.336  | 0.469  | 6.759  | 0      | 0.133  | 4.216  |
| 1138 | 5.086  | 0.612 | 0.354  | 2.534  | 0.955  | 0.871  | 3.832  | 0.452  | 0.106  | 1.849  |
| 1140 | 1.486  | 1.235 | 0      | 2.179  | 1.998  | 4.837  | 1.144  | 2.687  | 0      | 1.596  |
| 1142 | 1.796  | 0.192 | 1.155  | 3.237  | 2.069  | 7.905  | 1.503  | 3.245  | 0.864  | 2.421  |
| 1144 | 15.109 | 0.105 | 2.073  | 2.225  | 0.751  | 1.540  | 11.761 | 0      | 1.316  | 1.490  |
| 1146 | 35.619 | 0.809 | 1.984  | 0.452  | 0.513  | 4.403  | 28.484 | 0      | 0.944  | 0      |
| 1148 | 44.480 | 0.850 | 1.925  | 0      | 1.347  | 6.965  | 35.855 | 0      | 0.797  | 0      |
| 1150 | 36.216 | 0.689 | 4.088  | 1.930  | 0.319  | 4.280  | 28.591 | 0      | 2.539  | 0.971  |



## Computed IR Spectra and Structures

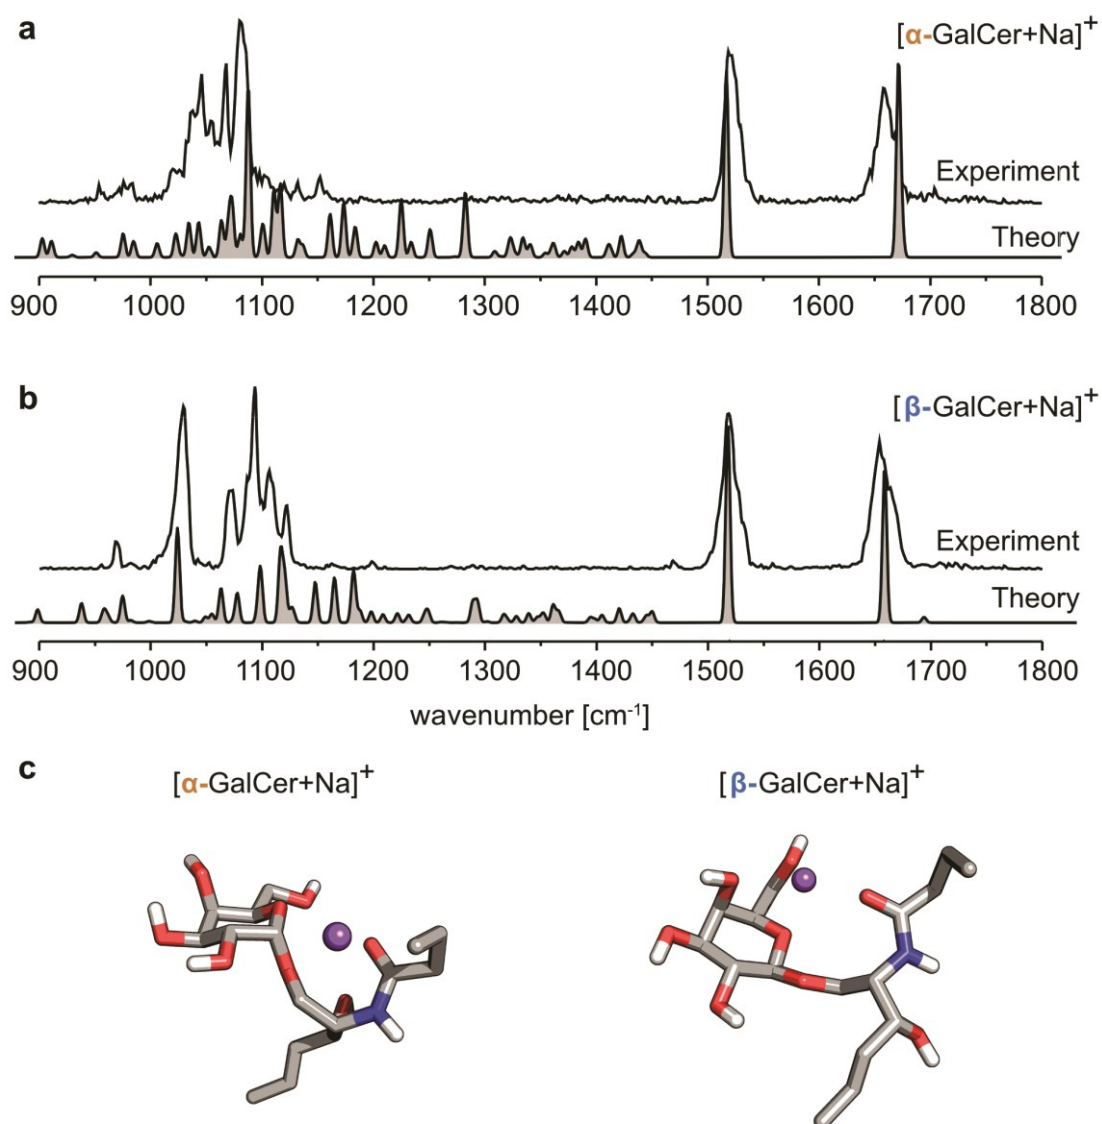

**Supplementary Fig. 22** Experimental and computed harmonic IR spectra of the lowest-energy conformers of  $[\text{M+Na}]^+$  ions with truncated lipid chains of  $\alpha\text{-GalCer}$  (**a**) and  $\beta\text{-GalCer}$  (d18:1/24:1(15Z)) (**b**). The corresponding three-dimensional structures with trimmed lipid chains are depicted in panel **c**.

## Cartesian Coordinates of Reoptimized Conformers

alpha GalCer [M+Na]<sup>+</sup>

|    |           |           |           |
|----|-----------|-----------|-----------|
| C  | -3.581851 | -0.751434 | 0.155061  |
| C  | -2.387941 | -0.707624 | 1.100383  |
| O  | -1.296734 | -1.492680 | 0.608646  |
| C  | -0.793590 | -1.075425 | -0.631097 |
| C  | -1.903998 | -1.086021 | -1.673578 |
| C  | -3.112079 | -0.275208 | -1.217119 |
| H  | -4.354000 | -0.062164 | 0.520765  |
| H  | -2.073145 | 0.345070  | 1.171443  |
| H  | -0.005913 | -1.788572 | -0.899581 |
| H  | -2.214569 | -2.136251 | -1.780345 |
| H  | -2.818080 | 0.777486  | -1.149625 |
| O  | -1.377957 | -0.586693 | -2.876226 |
| H  | -2.112062 | -0.485686 | -3.491399 |
| O  | -4.133021 | -0.343204 | -2.180220 |
| H  | -4.550449 | -1.208506 | -2.090408 |
| O  | -4.104107 | -2.057503 | -0.009321 |
| H  | -4.871434 | -2.181721 | 0.551308  |
| C  | -2.655925 | -1.211483 | 2.494625  |
| H  | -2.838915 | -2.290778 | 2.465563  |
| H  | -3.532821 | -0.697722 | 2.906397  |
| O  | -1.493103 | -0.914900 | 3.271113  |
| H  | -1.614723 | -1.246527 | 4.163551  |
| O  | -0.219882 | 0.194778  | -0.409044 |
| C  | 0.768713  | 0.612943  | -1.339015 |
| H  | 1.189152  | -0.248157 | -1.867262 |
| H  | 0.286995  | 1.246292  | -2.087261 |
| C  | 1.904829  | 1.405689  | -0.682550 |
| H  | 2.240037  | 2.083816  | -1.474455 |
| C  | 1.499373  | 2.357467  | 0.456778  |
| H  | 2.362106  | 3.016266  | 0.624517  |
| N  | 3.095633  | 0.622233  | -0.360824 |
| H  | 3.972687  | 1.003717  | -0.677288 |
| C  | 3.156920  | -0.577434 | 0.249880  |
| O  | 2.158579  | -1.164902 | 0.666572  |
| C  | 4.527651  | -1.195369 | 0.377916  |
| H  | 5.296145  | -0.557739 | -0.072527 |
| H  | 4.744432  | -1.258930 | 1.449778  |
| C  | 4.561809  | -2.592743 | -0.243908 |
| H  | 3.803518  | -3.208882 | 0.248540  |
| H  | 5.532582  | -3.044417 | -0.018839 |
| C  | 4.330227  | -2.576955 | -1.748056 |
| H  | 5.080290  | -1.965954 | -2.261184 |
| H  | 3.342197  | -2.175405 | -1.998670 |
| H  | 4.385865  | -3.585237 | -2.164721 |
| O  | 1.275062  | 1.613730  | 1.668074  |
| H  | 1.152993  | 2.266189  | 2.363680  |
| C  | 0.308080  | 3.190384  | 0.105187  |
| H  | -0.623189 | 2.649979  | -0.053852 |
| C  | 0.352872  | 4.517569  | -0.007628 |
| H  | 1.305429  | 5.021964  | 0.164059  |
| C  | -0.799576 | 5.390726  | -0.363103 |
| H  | -0.590193 | 5.951574  | -1.280203 |
| H  | -1.715698 | 4.815242  | -0.513477 |
| H  | -0.979275 | 6.134038  | 0.420767  |
| Na | 0.455165  | -0.551283 | 1.930643  |

beta GalCer [M+Na]<sup>+</sup>

|    |             |             |             |
|----|-------------|-------------|-------------|
| C  | -3.81481000 | -0.63343200 | 0.02094100  |
| C  | -2.91707300 | -0.78500200 | 1.24033100  |
| O  | -1.59959200 | -0.38961400 | 0.89001600  |
| C  | -1.48343700 | 0.98726900  | 0.53639900  |
| C  | -2.45375300 | 1.36591700  | -0.57928900 |
| C  | -3.86112800 | 0.84053700  | -0.35344600 |
| H  | -4.82801100 | -0.98056300 | 0.25753600  |
| H  | -3.31651600 | -0.11943600 | 2.02127400  |
| H  | -1.65229000 | 1.59781700  | 1.43896000  |
| H  | -2.06551000 | 0.90075000  | -1.49555600 |
| H  | -4.33443200 | 1.40632000  | 0.46199900  |
| O  | -2.54862300 | 2.76000300  | -0.73000200 |
| H  | -1.69960500 | 3.09597400  | -1.03067700 |
| O  | -4.62186400 | 0.93045300  | -1.53406100 |
| H  | -4.59001200 | 1.83842400  | -1.85146000 |
| O  | -3.27747900 | -1.38549900 | -1.05984300 |
| H  | -3.76665300 | -1.11117200 | -1.84567400 |
| C  | -2.83841300 | -2.16348900 | 1.86305600  |
| H  | -3.85836400 | -2.51378000 | 2.05873500  |
| H  | -2.30467600 | -2.08139300 | 2.81660700  |
| O  | -2.15156400 | -3.05278000 | 0.99392500  |
| H  | -2.15739100 | -3.93290100 | 1.37477300  |
| O  | -0.22778300 | 1.17286600  | 0.00352700  |
| C  | 0.87463500  | 0.93125100  | 0.87793600  |
| H  | 1.04423400  | 1.80670400  | 1.51241100  |
| H  | 0.66332900  | 0.06436000  | 1.50592500  |
| C  | 2.08462200  | 0.64024600  | -0.01657900 |
| H  | 1.69746800  | 0.50123900  | -1.02978600 |
| C  | 3.10753100  | 1.77722600  | -0.03787400 |
| H  | 3.88215500  | 1.49575200  | -0.76850900 |
| N  | 2.77113500  | -0.57930000 | 0.36093000  |
| H  | 3.60843400  | -0.48296500 | 0.91706600  |
| C  | 2.28898200  | -1.79663500 | 0.07747900  |
| O  | 1.21841600  | -1.94120000 | -0.52604900 |
| C  | 3.11333600  | -2.97980900 | 0.50996500  |
| H  | 4.01452200  | -2.65006900 | 1.03695500  |
| H  | 2.50680300  | -3.54876200 | 1.22280000  |
| C  | 3.48690600  | -3.86572900 | -0.67987300 |
| H  | 2.56686400  | -4.20305300 | -1.16715300 |
| H  | 3.98567500  | -4.76046300 | -0.29570000 |
| C  | 4.38358200  | -3.16001000 | -1.68575100 |
| H  | 5.31384400  | -2.82020300 | -1.21917700 |
| H  | 3.88858800  | -2.28605500 | -2.12176200 |
| H  | 4.65197600  | -3.82749400 | -2.50771000 |
| O  | 3.66511800  | 1.80540600  | 1.26267900  |
| H  | 4.34087700  | 2.48762500  | 1.29720400  |
| C  | 2.48957500  | 3.07153000  | -0.47205400 |
| H  | 2.20572600  | 3.11805900  | -1.52288700 |
| C  | 2.28888500  | 4.12410500  | 0.31681200  |
| H  | 2.58113000  | 4.05391200  | 1.36428600  |
| C  | 1.68760700  | 5.41588100  | -0.12064900 |
| H  | 2.38340700  | 6.24536700  | 0.04291900  |
| H  | 1.41930300  | 5.40102600  | -1.17958500 |
| H  | 0.78971900  | 5.64579700  | 0.46323400  |
| Na | -0.96762300 | -2.00926800 | -0.69723000 |

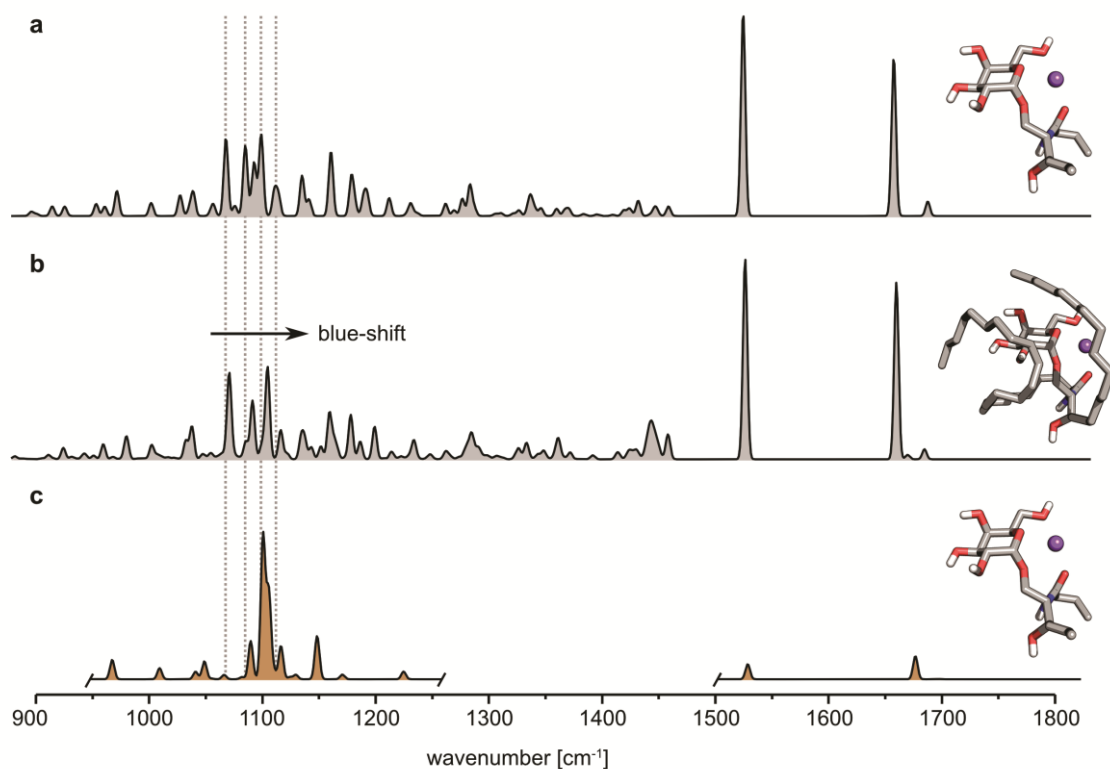

**Supplementary Fig. 23** Comparison of the theoretical spectrum of a low-energy conformer of [α-GalCer+Na]<sup>+</sup> (**a**) with lipid chains truncated to include only relevant functional groups of the lipid chain and calculated within harmonic approximation; (**b**) with full lipid chains attached to the same core-structure of the ion and calculated with harmonic approximation and (**c**) with lipid chains truncated and calculated including anharmonic effects. Attachment of the full lipid chains results in only minor changes to the diagnostic region (average blue-shift of 5 cm<sup>-1</sup>) of the IR spectrum between 1000 and 1150 cm<sup>-1</sup>. Anharmonicity of the potential has a larger impact on the IR spectrum.

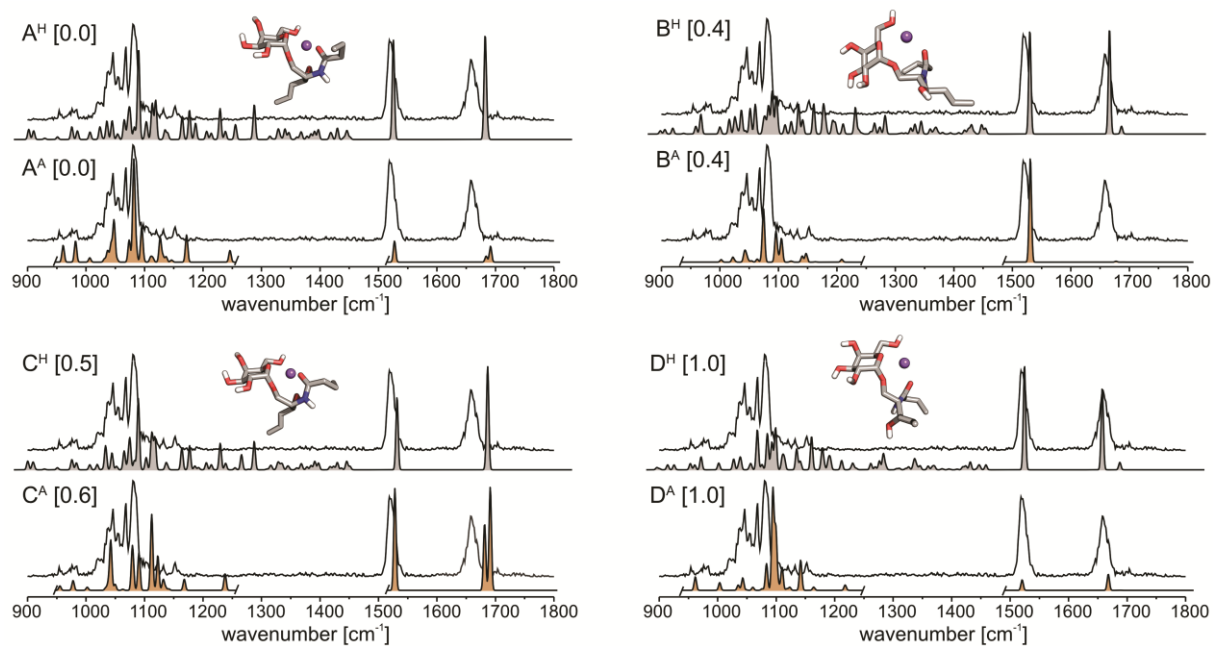

**Supplementary Fig. 24** Comparison of the harmonic (gray, scaled by 0.965) and anharmonic (orange, red-shifted by 20  $\text{cm}^{-1}$ ) theoretical IR spectra of four low-energy conformers of  $[\alpha\text{-GalCer+Na}]^+$  with lipid chains truncated to include only relevant functional groups. The experimental spectrum of the  $[\alpha\text{-GalCer+Na}]^+$  cation is shown as black trace. The numbers next to the label indicate the relative electronic energy (in  $\text{kcal mol}^{-1}$ ), including harmonic ( $^H$ ) or anharmonic ( $^A$ ) zero-point energy corrections. Evaluation of anharmonic vibrations only considered bands in the 1000–1150  $\text{cm}^{-1}$  diagnostic region, amide I and II, and C=C vibrations.

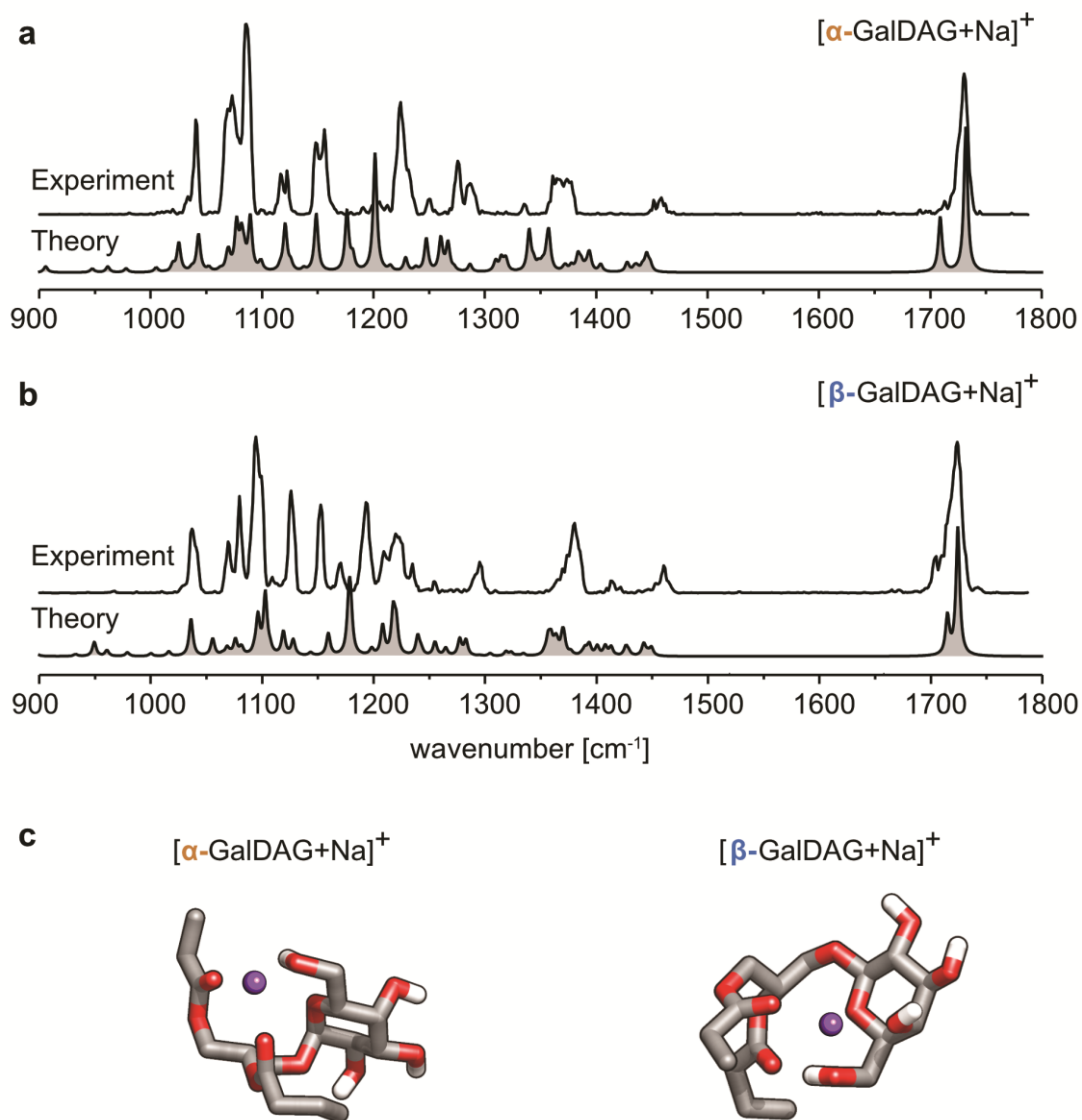

**Supplementary Fig. 25:** Experimental and computed harmonic IR spectra of [M+Na]<sup>+</sup> ions of  $\alpha$ -Gal DAG (**a**) and  $\beta$ -Gal DAG (14:0/14:0) (**b**). The anomers are distinguishable by characteristic C–C, C–O and C–H vibrations, which are difficult to model. The C=O frequencies, however, are in good agreement with the experiment and consist of in- and out-of-phase vibrations of the two ester groups. The corresponding three-dimensional structures with trimmed lipid chains are depicted in panel **c**.

## Cartesian Coordinates of Reoptimized Conformers

alpha GalDAG [M+Na]<sup>+</sup>

|    |          |          |          |
|----|----------|----------|----------|
| C  | -2.74570 | -0.98040 | 1.27550  |
| C  | -1.24810 | -0.74730 | 1.14980  |
| C  | -1.21420 | -1.46390 | -1.13620 |
| C  | -2.70560 | -1.76310 | -1.09360 |
| C  | -3.40290 | -0.85400 | -0.09240 |
| H  | -1.08830 | 0.31170  | 0.90360  |
| H  | -2.82630 | -2.79890 | -0.76670 |
| H  | -3.32190 | 0.18830  | -0.43430 |
| O  | -0.63530 | -1.55110 | 0.13910  |
| O  | -1.07310 | -0.19030 | -1.71760 |
| O  | -3.29610 | -1.66880 | -2.36610 |
| H  | -3.03050 | -0.82420 | -2.74660 |
| O  | -4.75170 | -1.22100 | 0.06830  |
| H  | -5.11740 | -1.40470 | -0.80360 |
| C  | -0.51600 | -1.09030 | 2.43120  |
| H  | -0.80080 | -0.39640 | 3.22420  |
| H  | -0.77520 | -2.10340 | 2.74500  |
| O  | 0.89630  | -0.97650 | 2.25340  |
| H  | 1.13850  | -1.65010 | 1.60990  |
| C  | 0.20610  | 0.11570  | -2.22770 |
| H  | 0.06110  | 0.74890  | -3.10750 |
| H  | 0.72680  | -0.79790 | -2.54030 |
| C  | 1.06570  | 0.84930  | -1.21930 |
| H  | 1.01080  | 0.34670  | -0.25370 |
| C  | 2.51690  | 0.97690  | -1.66310 |
| H  | 3.05730  | 1.64640  | -0.99150 |
| H  | 2.58300  | 1.35640  | -2.68360 |
| O  | 0.52880  | 2.17610  | -1.09320 |
| O  | 3.15490  | -0.30290 | -1.69330 |
| C  | 0.60860  | 2.78720  | 0.08730  |
| C  | 3.60450  | -0.79800 | -0.54060 |
| O  | 3.44300  | -0.23060 | 0.52250  |
| O  | 1.15620  | 2.28630  | 1.05300  |
| C  | -0.08340 | 4.11030  | 0.10630  |
| H  | 0.54710  | 4.80010  | 0.67230  |
| H  | -0.19260 | 4.48080  | -0.91490 |
| C  | -1.45930 | 3.98930  | 0.78230  |
| H  | -1.85330 | 5.00180  | 0.90600  |
| H  | -1.32300 | 3.58640  | 1.79160  |
| C  | -2.44760 | 3.14310  | -0.00550 |
| H  | -2.08120 | 2.12420  | -0.16460 |
| H  | -3.40510 | 3.07840  | 0.51670  |
| H  | -2.63550 | 3.57390  | -0.99330 |
| C  | 4.32240  | -2.09630 | -0.72640 |
| H  | 3.72890  | -2.71100 | -1.41060 |
| H  | 5.24150  | -1.86230 | -1.27810 |
| C  | 4.62910  | -2.81360 | 0.57480  |
| H  | 5.23590  | -2.19300 | 1.23650  |
| H  | 3.71460  | -3.08450 | 1.10890  |
| H  | 5.18030  | -3.73340 | 0.37320  |
| Na | 2.32370  | 0.76880  | 2.18240  |
| H  | -0.68750 | -2.20880 | -1.74320 |
| O  | -2.96950 | -2.25520 | 1.82080  |
| H  | -3.90500 | -2.45160 | 1.69150  |
| H  | -3.15420 | -0.19850 | 1.93530  |

beta GalDAG [M+Na]<sup>+</sup>

|    |          |          |          |
|----|----------|----------|----------|
| C  | -3.16620 | -0.52630 | -1.46810 |
| H  | -3.67150 | -1.00550 | -2.31550 |
| C  | -4.05100 | -0.64080 | -0.23210 |
| C  | -3.32010 | -0.19360 | 1.02820  |
| H  | -3.13560 | 0.88870  | 0.96410  |
| O  | -4.16310 | -0.49960 | 2.10740  |
| H  | -3.79200 | -0.12940 | 2.91300  |
| C  | -1.96420 | -0.87340 | 1.13230  |
| O  | -1.27530 | -0.29990 | 2.18440  |
| C  | 0.00540  | -0.86570 | 2.43470  |
| C  | 1.07200  | -0.10230 | 1.65620  |
| C  | 1.44210  | 1.20640  | 2.31320  |
| H  | 1.97200  | 1.04120  | 3.25180  |
| H  | 0.53840  | 1.79390  | 2.49170  |
| O  | 2.36090  | 1.94810  | 1.49980  |
| C  | 1.88100  | 2.54830  | 0.41840  |
| O  | 0.70070  | 2.51490  | 0.11970  |
| Na | -0.91020 | 1.68770  | -1.14350 |
| O  | 0.00900  | -0.04000 | -2.29810 |
| H  | 0.83280  | -0.26330 | -1.83570 |
| C  | -0.80250 | -1.19770 | -2.33390 |
| C  | -1.84400 | -1.22820 | -1.20650 |
| H  | -2.08600 | -2.28350 | -1.00720 |
| O  | -1.23140 | -0.65120 | -0.06250 |
| H  | -0.17370 | -2.08880 | -2.25370 |
| H  | -1.31300 | -1.23400 | -3.29990 |
| O  | -5.17480 | 0.16900  | -0.47770 |
| H  | -5.72880 | 0.17640  | 0.30930  |
| C  | 2.94500  | 3.25800  | -0.35730 |
| C  | 2.48250  | 3.73650  | -1.72050 |
| H  | 2.18380  | 2.89740  | -2.35480 |
| H  | 1.63770  | 4.42310  | -1.63490 |
| H  | 3.29250  | 4.26330  | -2.22790 |
| H  | 3.28260  | 4.09430  | 0.26710  |
| H  | 3.80400  | 2.58390  | -0.42800 |
| H  | 0.69060  | 0.07930  | 0.65800  |
| O  | 2.23770  | -0.92590 | 1.54400  |
| C  | 2.74280  | -1.10810 | 0.31380  |
| O  | 2.25050  | -0.62930 | -0.68600 |
| C  | 3.98760  | -1.94000 | 0.33880  |
| C  | 4.20390  | -2.72760 | -0.94710 |
| C  | 3.16060  | -3.81590 | -1.15500 |
| H  | 3.16450  | -4.53280 | -0.32790 |
| H  | 3.35090  | -4.37210 | -2.07560 |
| H  | 2.15310  | -3.39290 | -1.22960 |
| H  | 4.20200  | -2.03630 | -1.79480 |
| H  | 5.20170  | -3.17400 | -0.90790 |
| H  | 4.81290  | -1.23530 | 0.50540  |
| H  | 3.95850  | -2.58840 | 1.21860  |
| H  | 0.17060  | -0.81210 | 3.51380  |
| H  | 0.02990  | -1.91890 | 2.13470  |
| H  | -2.07500 | -1.96120 | 1.28370  |
| H  | -4.34720 | -1.69230 | -0.10410 |
| O  | -2.93760 | 0.84720  | -1.76530 |
| H  | -3.80640 | 1.26980  | -1.75110 |
